# Supplementary material for: Investigating self-perceived health and quality of life: a longitudinal prospective study among beginner recreational exercisers in a fitness club setting
Source: PubMed Central journal article supplement — BMJ Open. 2020 Jun 7;10(6):e036250. doi: 10.1136/bmjopen-2019-036250 (PMC7282339; doi:10.1136/bmjopen-2019-036250), 2020-06-07
Supplement: bmjopen-2019-036250.draft_revisions.pdf [file bmjopen-2019-036250.draft_revisions.pdf]

# BMJ Open

BMJ Open is committed to open peer review. As part of this commitment we make the peer review history of every article we publish publicly available.

When an article is published we post the peer reviewers' comments and the authors' responses online. We also post the versions of the paper that were used during peer review. These are the versions that the peer review comments apply to.

The versions of the paper that follow are the versions that were submitted during the peer review process. They are not the versions of record or the final published versions. They should not be cited or distributed as the published version of this manuscript.

BMJ Open is an open access journal and the full, final, typeset and author-corrected version of record of the manuscript is available on our site with no access controls, subscription charges or pay-per-view fees (<http://bmjopen.bmj.com>).

If you have any questions on BMJ Open's open peer review process please email [info.bmjopen@bmj.com](mailto:info.bmjopen@bmj.com)

# BMJ Open

## **Self-Perceived Health and Quality of Life; - a one year follow-up study among new beginner exercisers in a fitness club setting**

|                               |                                                                                                                                                                                                                      |
|-------------------------------|----------------------------------------------------------------------------------------------------------------------------------------------------------------------------------------------------------------------|
| Journal:                      | <i>BMJ Open</i>                                                                                                                                                                                                      |
| Manuscript ID                 | bmjopen-2019-036250                                                                                                                                                                                                  |
| Article Type:                 | Original research                                                                                                                                                                                                    |
| Date Submitted by the Author: | 11-Dec-2019                                                                                                                                                                                                          |
| Complete List of Authors:     | Heiestad, Hege; Norwegian School of Sports Science<br>Gjestvang, Christina; Norwegian School of Sports Sciences, Department of Sports Medicine<br>Haakstad, Lene; Norwegian School of Sport Sciences, Sport Medicine |
| Keywords:                     | SPORTS MEDICINE, PUBLIC HEALTH, MENTAL HEALTH                                                                                                                                                                        |
|                               |                                                                                                                                                                                                                      |

SCHOLARONE™  
Manuscripts

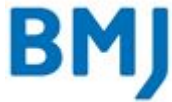

I, the Submitting Author has the right to grant and does grant on behalf of all authors of the Work (as defined in the below author licence), an exclusive licence and/or a non-exclusive licence for contributions from authors who are: i) UK Crown employees; ii) where BMJ has agreed a CC-BY licence shall apply, and/or iii) in accordance with the terms applicable for US Federal Government officers or employees acting as part of their official duties; on a worldwide, perpetual, irrevocable, royalty-free basis to BMJ Publishing Group Ltd ("BMJ") its licensees and where the relevant Journal is co-owned by BMJ to the co-owners of the Journal, to publish the Work in this journal and any other BMJ products and to exploit all rights, as set out in our [licence](#).

The Submitting Author accepts and understands that any supply made under these terms is made by BMJ to the Submitting Author unless you are acting as an employee on behalf of your employer or a postgraduate student of an affiliated institution which is paying any applicable article publishing charge ("APC") for Open Access articles. Where the Submitting Author wishes to make the Work available on an Open Access basis (and intends to pay the relevant APC), the terms of reuse of such Open Access shall be governed by a Creative Commons licence – details of these licences and which [Creative Commons](#) licence will apply to this Work are set out in our licence referred to above.

Other than as permitted in any relevant BMJ Author's Self Archiving Policies, I confirm this Work has not been accepted for publication elsewhere, is not being considered for publication elsewhere and does not duplicate material already published. I confirm all authors consent to publication of this Work and authorise the granting of this licence.

1  
2  
3 **Self-Perceived Health and Quality of Life;**  
4  
5 **- a one year follow-up study among new beginner exercisers**  
6  
7 **in a fitness club setting**  
8  
9

10  
11  
12 Hege Heiestad, Physical therapist, exercise scientist, MSc

13  
14 Norwegian School of Sports Sciences, Department of Sports Medicine, Oslo, Norway

15  
16 (E-mail: [hege.heiestad@nih.no](mailto:hege.heiestad@nih.no))  
17  
18

19  
20  
21 Christina Gjestvang, PhD student, exercise scientist, MSc

22  
23 Norwegian School of Sports Sciences, Department of Sports Medicine, Oslo, Norway

24  
25 (E-mail: [christina.gjestvang@nih.no](mailto:christina.gjestvang@nih.no))  
26  
27

28  
29  
30 Lene A. H. Haakstad, Associate professor, exercise scientist, MSc, PhD

31  
32 Norwegian School of Sports Sciences, Department of Sports Medicine, Oslo, Norway

33  
34 (E-mail: [lahaakstad@nih.no](mailto:lahaakstad@nih.no))  
35  
36  
37  
38  
39  
40  
41

42 **Correspondent author**

43  
44 Hege Heiestad

45  
46 Norwegian School of Sport Sciences

47  
48 Department of Sports Medicine

49  
50 P.O Box 4014, Ullevål Stadion

51  
52 0806 Oslo, Norway

53  
54 Tlf. +47 92 23 93 04

55  
56 E-mail: [hege.heiestad@nih.no](mailto:hege.heiestad@nih.no)  
57  
58  
59  
60

## ABSTRACT

**Objectives:** It is growing interest for assessment of physical activity on modification of Self-Perceived Health (SPH) and Quality of life (QoL). This study investigated SPH and QoL at onset and after three, six and 12 months of fitness club membership. Also, we compared SPH and QoL between those who reported regular use of the fitness club ( $\geq$  two exercise sessions/week the last month) with those who did not (one exercise session/week, or no exercise the last month).

**Methods:** In total, 250 newly registered fitness club members (equal numbers of men and women, mean age =  $36.4 \pm 11.3$  years, mean BMI =  $25.7 \pm 4.4$ ) were recruited. At onset of fitness club membership (n=250), and after three (n=225), six (n=213) and 12 months (n=187), the participants answered an electronic questionnaire, covering background variables, exercise involvement, perceived SPH and QoL. SPH was measured by a single item question, rating health status from poor to excellent on a five-point scale. High SPH was dichotomized as excellent or good, and low SPH as moderate, fair or poor. QoL was measured on a 7-item scale, rating five statements and dichotomized according to a total max sum score of 35, with low QoL  $\leq 25$  and high QoL  $>25$ . Chi-square analysis, Mc Nemars test, Cochran's Q, paired sample t-test, one way-repeated measures ANOVA and regression analysis was used as appropriate.

**Results:** At onset, most (66.4%) of the participants rated their SPH as high, whereas the opposite was found for QoL (35.2%). Throughout the initial year of fitness club membership, repeated measurements did not show any changes in SPH. In QoL, we observed an improvement in QoL sum score and a significant increase in mean scores for two out of five statements at 12 months follow-up: "*In most ways my life is close to my ideal*" (p=0.036) and "*If I could live my life over, I would change almost nothing*" (p=0.000). Reporting regular use of the fitness club was associated with high SPH (OR 3.532 [95% CI 1.60 to 7.82], p=0.002)

1  
2  
3 and high QoL (OR 1.914 [95% CI 0.95 to 3.86], p=0.069). The results were unchanged after  
4  
5 adjusting for confounders.  
6

7 **Conclusions:** Regular attendance at a fitness club was associated with high SPH and high  
8  
9 QoL at 12 months follow-up.  
10

11 **Keywords:** Exercise, Self-Perceived Health, Quality of Life, Fitness clubs.  
12  
13  
14  
15  
16  
17  
18

### 19 **STRENGTHS AND LIMITATIONS OF THIS STUDY**

- 20
- 21 • The use of a prospective study design with 12 months follow-up.
- 22
- 23 • Valid and reliable measurement methods.
- 24
- 25 • The use of an electronic questionnaire based on previously validated surveys.
- 26
- 27 • Self-reported attendance at the fitness club.
- 28
- 29
- 30
- 31
- 32
- 33
- 34
- 35
- 36
- 37
- 38
- 39
- 40
- 41
- 42
- 43
- 44
- 45
- 46
- 47
- 48
- 49
- 50
- 51
- 52
- 53
- 54
- 55
- 56
- 57
- 58
- 59
- 60

## INTRODUCTION

According to the World Health Organization (1), health is not only absence of somatic disease, but also includes mental and social well-being, putting emphasis on the usefulness and need for investigating individuals' self-perception of overall health (SPH). Several studies have shown that low SPH may be a valid and robust predictor of morbidity and mortality of various diseases (2-5), as well as are associated with being sick-listed and frequent use of health care services (6,7). In different patient groups and among the elderly population, SPH has widely been used to evaluate the effect of health-care programs (8). The measure is a single item question, including rating of health status from poor to excellent on a five-point scale, and as such popular for its simplicity and cost-effectiveness (9).

It is growing interest for assessment of physical activity on modification of SPH, and studies have indicated a strong association between insufficient physical activity and lower SPH in adults, especially in older individuals (10,11). However, it is important to understand SPH not only between physically active and inactive people, but also if this differs between activity contexts and exercise involvement (12).

Quality of life (QoL) has also become an important measurement because it is a meaningful indicator of both mental and physical well-being (13,14), and its positive association with physical activity has been consistently reported in the systematic reviews and meta-analyses (15,16). Although there is limited data, it is suggested that QoL may be a key motivator for regular physical activity and exercise (17), meaning that individuals start and continue to be active because this contributes to their QoL. However, cross-sectional data precludes a conclusion regarding the nature of this association (18).

1  
2  
3 Throughout the 1990s, a new venue for physical activity and exercise gradually grew in  
4 popularity, the fitness clubs. Worldwide, the fitness club industry has about 183 million  
5 members and counts more than 210 000 clubs (19). Even though this arena has become a  
6 large and growing venue for activity, the scientific knowledge of those that choose to be a  
7 member is scant. No study has examined SPH and QoL-status of fitness club members, and  
8 changes from onset of fitness club membership to one-year follow-up.  
9  
10  
11  
12  
13  
14  
15  
16  
17  
18

19 Those who join a fitness club may be initially motivated to exercise, still previous studies  
20 have shown a high dropout-rate after only three months (20,21). This shows that  
21 maintaining regular exercise can be challenging even for motivated individuals. Thus, the  
22 primary aim of the present study was to investigate SPH and QoL at onset and after three, six  
23 and 12 months of fitness club membership. Secondary, we wanted to examine if SPH and  
24 QoL differed between those who reported regular use of the fitness club ( $\geq$  two exercise  
25 sessions/week the last month) with those who did not (one exercise session/week, or no  
26 exercise the last month).  
27  
28  
29  
30  
31  
32  
33  
34  
35  
36  
37  
38  
39  
40  
41  
42  
43  
44  
45  
46  
47  
48  
49  
50  
51  
52  
53  
54  
55  
56  
57  
58  
59  
60



## MATERIALS AND METHODS

### Study design and population

The present study was part of a longitudinal prospective study (21,22), aiming to investigate which factors that influence the probability of regularly exercise or exercise drop-out among new fitness club members.

The project was reviewed by the Regional Committee for Medical and Health Research Ethics (REK 2015/1443 A), who concluded that, according to the act on medical and health research (the Health Research Act 2008), the study did not require full review by REK. The procedures followed the World Medical Association Declaration of Helsinki and was approved by the Norwegian Social Science Data Service (NSD 44135), financed and conducted at the Norwegian School of Sport Sciences (NSSS) (October 2015 - November 2018). No economic compensation was given to the participants.

New members at 25 fitness clubs in Oslo, Norway were contacted by an e-mail invitation. At first contact, the aims and implications of the study were explained, and the eligibility criteria checked. Due to the primary aim of the original study with assessment of VO<sub>2</sub> max and one-repetition maximum strength (1RM), inclusion criteria were to be healthy (no chronic serious disease or pathology, i.e. heart disease or severe hypertension) and not pregnant. Moreover, only physically inactive individuals (exercising <60 min/week at moderate or vigorous intensity or brisk walking <150 min/week, the last six months), ≥18 years, with <4 weeks membership were eligible to partake in the study.

Sample size considerations for SPH was done together with a professor in bio statistics at NSSS, based on findings in another study (23). When an individual start exercising, it may be

1  
2  
3 that small changes occur in QoL, such as going from 23 (low QoL) to 26 (high QoL) on the  
4  
5 35 points Likert-scale for QoL. It was estimated that with 70 participants, we would be able to  
6  
7 detect a 10% change in SPH over a one-year follow-up period. Similarly, with a power of  
8  
9 80% at the 0.05 level, we would be able to identify small changes in SPH, such as going from  
10  
11 three to four on the five-point Likert-scale, with 93 participants. To account for losses to  
12  
13 follow-up and be able to do subgroup analyses, we aimed to recruit all individuals who  
14  
15 fulfilled the eligibility criteria. In total, 676 fitness club members wanted to participate in the  
16  
17 study. We excluded those who already exercised regularly (n=270) or had cardiovascular  
18  
19 disease, hypertension or asthma (n=8). In addition, 148 individuals did not respond after the  
20  
21 first email, leaving 250 enrolling in the study (Figure 1).  
22  
23  
24  
25  
26  
27

### 28 **Data-collection and measurements**

29  
30 A standardized electronic questionnaire was answered at onset and after three, six and 12  
31  
32 months' fitness club membership. A pretest of the questionnaire was conducted by four  
33  
34 members in the research group, as well as four volunteers. The final questionnaire contained  
35  
36 52 questions at onset and 65 questions at three, six and 12 months. At all time-points, the  
37  
38 questionnaire took approximately 30 minutes to complete and was answered electronically.  
39  
40  
41  
42  
43

44 SPH was assessed by answering a global single question: "*In general, how would you rate*  
45  
46 *your health today?*". The response options were ranked from 1-5, with the following  
47  
48 description: excellent, good, moderate, fair and poor. According to these five levels, we also  
49  
50 divided the participants into two categories: high SPH (excellent and good) and low SPH  
51  
52 (moderate, fair and poor) to investigate the association between SPH and exercise behavior,  
53  
54 an approach adopted by other researchers (24,25).  
55  
56  
57  
58  
59  
60

1  
2  
3 QoL was measured by a Norwegian version of the Satisfaction of Life Scale (SWLS) (26).

4  
5 SWLS has widely been used to examine the subjective QoL of people experiencing different

6  
7 health concerns (25) and is considered to be a reliable and valid instrument (27, 28). QoL is

8  
9 measured on a 7-item scale, where the participants rate five different statements from

10  
11 “strongly disagree” = 1 to “strongly agree” = 7:

12  
13 1. *“In most ways my life is close to my ideal”*

14  
15 2. *“The conditions of my life are excellent”*

16  
17 3. *“I am satisfied with my life”*

18  
19 4. *“So far I have gotten the important things I want in life”*

20  
21 5. *“If I could live my life over, I would change almost nothing”*

22  
23  
24  
25  
26  
27  
28 The results from QoL were analyzed separately for each statement and as a sum score (29-

29  
30 32). For the purpose of this study, we also dichotomized QoL into two main groups; low QoL

31  
32 (scores 5-25) and high QoL (scores 26-35).

33  
34  
35  
36  
37 To examine the role of regular exercise on SPH and QoL, we asked the participants to report

38  
39 exercise involvement at the fitness club the last four weeks: 1) *“Have you been a member?”*:

40  
41 “yes” or “no”, 2) *“Have you been exercising regularly?”*: “yes” or “no”, 3) *“How often have*

42  
43 *you exercised per week on average?”*: “once a week”, “twice a week”, “three times a week”,

44  
45  
46 “four times a week”, “five times a week”, “six times a week” or “seven times a week or

47  
48 more”. Regular use of the fitness club was defined as exercising  $\geq$  two times a week, whereas

49  
50 non-regular use was defined as one exercise session/week, or no exercise the last month (33).

51  
52 Information related to demographic variables and socioeconomic status were obtained from

53  
54 the questionnaire answered at onset, covering age, gender, body weight, level of education,

55  
56  
57 total household income, cohabitation, children and occupation.

## Statistical analyses

Statistical Package for the Social Sciences (SPSS) – 25.0 for Windows was used for statistical analysis. Data are presented as numbers with percentages or means with standard deviations (SD), as well as Odds Ratio (OR) with 95% Confidence Intervals (CI) and p-values. Chi-square analysis was used to compare categorical variables and two-sided independent sample t-test for continuous variables (Table 1). In addition, Mc Nemars test, Cochran's Q, paired sample t-test and one way-repeated measures ANOVA were used to analyze changes in SPH and QoL. Data (Table 2 and 3) are reported for participants who completed the questionnaire at onset of fitness club membership (n=250), three months (n=225), six months (n=213) and 12 months (n=187), whereas p-values are shown for participants that completed the questionnaire at all measurements points only (n=184). Not all participants answered every question, as such individual questions may have varying response rate.

To assess the difference between those who reported regularly use of the fitness club (n=70), with those who did not (n=93) on SPH and QoL, we included prospective data obtained at 12 months. If there was pre-existing evidence or hypothesis that a factor could be a potential cofounder for the association between exercise and SPH or QoL, logistic regression was performed to explore group differences with adjustments for covariates. The final adjusted model contained seven variables: exercise, age, cohabitation, total household income, Body Mass Index (BMI), children and gender, all entered in step 1 in the above order.

## RESULTS

General characteristic of all participants at onset of fitness club membership, divided into high and low SPH and QoL, is showed in Table 1. In total, 66.4% and 35.2% rated their SPH and QoL as high, respectively. There were no gender differences concerning SPH, but more women (41.9%) than men (28.8%) rated their QoL as high. The high SPH group had lower age, mean BMI and fewer were overweight or obese compared with the low SPH group.

Participants with high QoL had higher age and were more likely to report high total household income, living with a partner and having children than the low QoL group (Table 1).

**Table 1:** General characteristics of the participants at onset of fitness club membership, divided into high and low SPH and QoL (n=250).

| Background variable                                | All<br>(n=250) | SPH<br>High<br>(n=166) | Low<br>(n=83) | p-value | QoL<br>High<br>(n=88) | Low<br>(n=161) | p-value |
|----------------------------------------------------|----------------|------------------------|---------------|---------|-----------------------|----------------|---------|
| Norwegian descent [n (%)]                          | 196 (78.4)     | 134 (80.7)             | 62 (74.7)     | 0.630   | 65 (73.9)             | 130 (80.7)     | 0.428   |
| Gender: Men [n (%)]                                | 125 (50.0)     | 83 (50.0)              | 42 (50.6)     | 1.000   | 36 (40.9)             | 89 (55.3)      | 0.042   |
| Age (years) [mean (SD) ]                           | 36.4 (11.3)    | 34.5 (10.5)            | 40.1 (11.9)   | 0.000   | 38.5 (12.1)           | 35.2(10.6)     | 0.027   |
| Age ≥ 40 years [n (%)]                             | 81             | 43                     | 37            | 0.010   | 33                    | 47             | 0.230   |
| BMI [mean (SD)]                                    | 25.7 (4.4)     | 25.2 (4.0)             | 26.6 (5.0)    | 0.017   | 25.3 (4.1)            | 25.9 (4.5)     | 0.263   |
| BMI ≥ 25 (overweight or obese) [n (%)]             | 121 (48.4)     | 72 (43.4)              | 48 (57.8)     | 0.044   | 36 (40.9)             | 85 (52.8)      | 0.097   |
| Education level:<br>University ≥ 4 years [n (%)]   | 102 (40.8)     | 66 (39.8)              | 36 (44.4)     |         | 40 (45.5)             | 61 (37.9)      | 0.304   |
| Total household income:<br>High > 80500 \$ [n (%)] | 114 (45.6)     | 74 (47.4)              | 40 (51.3)     |         | 51 (62.2)             | 62 (40.8)      | 0.003   |
| Living with a partner [n (%)]                      | 153 (61.2)     | 102 (61.4)             | 50 (60.2)     | 0.963   | 70 (79.5)             | 82 (50.9)      | 0.000   |
| Children                                           | 80 (32)        | 50 (31.1)              | 29 (34.9)     | 0.531   | 36 (40.9)             | 44 (27.3)      | 0.040   |
| Employed outside of home [n (%)]                   | 185 (74.0)     | 120 (72.3)             | 64 (77.1)     | 0.134   | 63 (71.6)             | 122 (75.8)     | 0.142   |

More details of study participants have been published previously (21,22). Throughout the initial year of fitness club membership, we found no changes in SPH (Table 2).

**Table 2:** SPH at onset, three, six and 12 months of fitness club membership. Results are shown in mean and standard deviation (SD) or numbers (n) and %. P-values are shown for participants that completed the questionnaire at all measurement points (n=184).

| Outcomes            | Onset<br>n=249<br>(men=125,<br>women=124) | Three months<br>n=225<br>(men=109,<br>women=116) | Six months<br>n=213<br>(men=106,<br>women=107) | 12 months<br>n=187<br>(men=96,<br>women=91) | p-value |
|---------------------|-------------------------------------------|--------------------------------------------------|------------------------------------------------|---------------------------------------------|---------|
| <b>SPH:</b>         |                                           |                                                  |                                                |                                             |         |
| Mean score (SD)     | 2.3 (0.7)                                 | 2.2 (0.8)                                        | 2.1 (0.7)                                      | 2.2 (0.7)                                   | 0.313   |
| High SPH [n (%)]    | 166 (66.7)                                | 158 (70.2)                                       | 158 (74.2)                                     | 128 (68.4)                                  | 0.359   |
| Low SPH n [(%)]     | 83 (33.3)                                 | 67 (29.8)                                        | 55 (25.8)                                      | 59 (31.6)                                   |         |
| - Excellent [n (%)] | 31 (12.4)                                 | 31 (13.8)                                        | 37 (17.4)                                      | 27 (14.4)                                   | 0.532   |
| - Good [n (%)]      | 135 (54.0)                                | 127 (56.4)                                       | 121 (56.8)                                     | 101 (54.0)                                  | 0.841   |
| - Moderate [n (%)]  | 73 (29.2)                                 | 54 (24)                                          | 48 (22.5)                                      | 51 (27.3)                                   | 0.430   |
| - Fair [n (%)]      | 8 (3.2)                                   | 11 (4.9)                                         | 6 (2.8)                                        | 8 (4.3)                                     | 0.943   |
| - Poor [n (%)]      | 2 (0.8)                                   | 2 (0.9)                                          | 1 (0.5)                                        | 0 (0.0)                                     | 0.300   |

In QoL measurements, we observed an increase in mean scores for all five statements, a significant increase in two out of five statements: “*In most ways my life is close to my ideal*” (p=0.036) and “*If I could live my life over, I would change almost nothing*” (p=0.000), and also an improvement in sum score (p = 0.071) (Table 3).

**Table 3:** QoL at onset, three, six and 12 months of fitness club membership. Results are shown in mean and standard deviation (SD) or numbers (n) and %. P-value are shown for participants that completed the questionnaire at all measurement points (n=184).

| Outcomes    | Onset<br>n=249<br>(men=125,<br>women=124) | Three months<br>n=225<br>(men=109,<br>women=116) | Six months<br>n=213<br>(men=106,<br>women=107) | 12 months<br>n=187<br>(men=96,<br>women=91) | p-value |
|-------------|-------------------------------------------|--------------------------------------------------|------------------------------------------------|---------------------------------------------|---------|
| <b>QoL:</b> |                                           |                                                  |                                                |                                             |         |

|                                                                           |            |            |            |            |                                                                                          |
|---------------------------------------------------------------------------|------------|------------|------------|------------|------------------------------------------------------------------------------------------|
| Sum score QoL [mean (SD)]                                                 | 22.2(6.7)  | 22.2(7.1)  | 22.5(6.9)  | 23.2(6.8)  | 0.071                                                                                    |
| High QoL [n (%)]                                                          | 88 (35.3)  | 76 (34.2)  | 79 (37.1)  | 76 (41.1)  | 0.263                                                                                    |
| Low QoL [n (%)]                                                           | 161 (64.7) | 146 (65.8) | 134 (62.9) | 109 (58.9) |                                                                                          |
| «In most ways my life is close to my ideal» [mean (SD)]                   | 4.1 (1.5)  | 4.3 (1.6)  | 4.3 (1.6)  | 4.4 (1.6)  | 0.036<br>(onset to 12 months; p=0.025)                                                   |
| «The conditions of my life are excellent» [mean (SD)]                     | 4.7 (1.5)  | 4.7 (1.5)  | 4.7 (1.5)  | 4.8 (1.5)  | 0.356                                                                                    |
| «I am satisfied with my life» [mean (SD)]                                 | 4.9 (1.6)  | 4.8 (1.6)  | 4.9 (1.5)  | 5.0 (1.5)  | 0.216                                                                                    |
| «So far I have gotten the important things I want in life» [mean (SD)]    | 4.5 (1.7)  | 4.4 (1.7)  | 4.5 (1.6)  | 4.7 (1.6)  | 0.068                                                                                    |
| «If I could live my life over, I would change almost nothing» [mean (SD)] | 4.0 (1.9)  | 4.0 (1.8)  | 4.1 (1.8)  | 4.3 (1.8)  | 0.000<br>(onset to 12 months; p=0.000, 3 to 12 months; p=0.001, 6 to 12 months; p=0.001) |

At all measurements, frequent use of the fitness club was associated with high SPH, as well as higher sum scores on QoL at 12 months follow-up (Table 4).

**Table 4:** SPH and QoL compared in participants reporting regular and non-regular use at a fitness center at three, six and 12 months. Results are shown in mean and standard deviation (SD) or numbers (n) and %.

|                           | Three months        |                         |         | Six months         |                         |         | 12 months          |                        |         |
|---------------------------|---------------------|-------------------------|---------|--------------------|-------------------------|---------|--------------------|------------------------|---------|
|                           | Regular use (n=116) | Non-regular use (n=106) | p-value | Regular use (n=82) | Non-regular use (n=125) | p-value | Regular use (n=70) | Non-regular use (n=93) | p-value |
| <b>SPH:</b>               |                     |                         |         |                    |                         |         |                    |                        |         |
| Mean score (SD)           | 2.1 (0.7)           | 2.4 (0.8)               | 0.001   | 1.9 (0.7)          | 2.3 (0.8)               | 0.001   | 1.9 (0.7)          | 2.4 (0.7)              | 0.000   |
| High SPH [n (%)]          | 91 (78.4)           | 67 (63.2)               | 0.018   | 69 (84.1)          | 85 (68.0)               | 0.015   | 59 (84.3)          | 57 (61.3)              | 0.002   |
| Low SPH [n (%)]           | 25 (21.6)           | 39 (36.7)               |         | 13 (15.8)          | 40 (32.0)               |         | 11 (15.8)          | 36 (38.7)              |         |
| <b>QoL:</b>               |                     |                         |         |                    |                         |         |                    |                        |         |
| Sum score QoL [mean (SD)] | 22.5 (6)            | 21.8 (7.6)              | 0.469   | 22.6 (7.2)         | 22.5 (6.8)              | 0.954   | 25.1 (5.5)         | 22.0 (7.0)             | 0.002   |
| High QoL [n (%)]          | 39 (34.2)           | 36 (34.0)               | 1.000   | 36 (43.9)          | 42 (33.6)               | 0.177   | 34 (49.3)          | 34 (36.6)              | 0.144   |
| Low QoL [n (%)]           | 75 (65.8%)          | 70 (66.0)               |         | 46 (56.1)          | 83 (66.4)               |         | 35 (50.7)          | 59 (63.4)              |         |

In Table 4, losses to follow-up (n=38 at three months, n=43 at 6 months and n=87 at 12 months) is categorized in the same group as participants not reporting regular use of the fitness club.

Also after adjusting for confounders (age, cohabitation, total household income, BMI, children and gender, regular use of the fitness club  $\geq$  two times weekly was associated with reporting high SPH (OR 3.532 [95% CI 1.60 to 7.82],  $p=0.002$ ) and QoL (OR 1.914 [95% CI 0.95 to 3.86],  $p=0.069$ ) (Table 5).

**Table 5:** The association between use of a fitness club and High SPH / QoL at 12 months, controlled for age, cohabitation, total household income, BMI, children and gender.

| Outcomes                                             | High SPH (n=128 (68.4%)) |                 |                           |         | High QoL (n=76 (40.6)) |                 |                           |         |
|------------------------------------------------------|--------------------------|-----------------|---------------------------|---------|------------------------|-----------------|---------------------------|---------|
|                                                      | %                        | Odds Ratio (OR) | 95%CI for OR, lower-upper | p-value | %                      | Odds Ratio (OR) | 95%CI for OR, lower-upper | p-value |
| Regular use (frequency $\geq$ two times weekly)      | 59 (50.9%)               | 3.532           | 1.595-7.821               | 0.002   | 34 (44.7%)             | 1.914           | 0.950-3.856               | 0.069   |
| Age (> 40 years)                                     | 44 (34.4%)               | 1.150           | 0.506-2.613               | 0.738   | 23 (30.3%)             | 1.388           | 0.636-3.032               | 0.410   |
| Living with a partner (yes)                          | 83 (64.8%)               | 0.644           | 0.274-1.509               | 0.311   | 57 (75%)               | 0.369           | 0.161-0.849               | 0.019   |
| High household income ( $\geq$ 80500 \$ per year)    | 59 (48.8%)               | 0.972           | 0.405-2.332               | 0.950   | 39 (51.3%)             | 1.214           | 0.540-2.726               | 0.639   |
| Body Mass Index (BMI) ( $\geq$ 25kg/m <sup>2</sup> ) | 66 (51.6%)               | 1.120           | 0.524-2.392               | 0.770   | 31 (40.8%)             | 1.985           | 0.983-4.010               | 0.056   |
| Children (yes)                                       | 37 (28.9%)               | 0.833           | 0.353-1.964               | 0.676   | 24 (31.6%)             | 1.072           | 0.480-2.395               | 0.866   |
| Gender (man)                                         | 70 (54.7%)               | 0.733           | 0.348-1.546               | 0.415   | 36 (47.4%)             | 1.387           | 0.688-2.796               | 0.360   |

To evaluate if the participants were representative of our initial study population, a comparison analysis was performed with the 63 participants lost to follow-up at 12 months. No differences were found with respect to SPH and QoL, nor demographic and socioeconomic variables (data not shown).



## DISCUSSION

To our knowledge, this is the first study that has investigated SPH and QoL among new beginner exercisers in a fitness club setting. Main findings were an increase in mean scores for all five statements in QoL and an improvement in QoL sum score throughout the follow-up period. No changes were observed for SPH the initial year of fitness club membership. Regularly fitness club users rated SPH higher at all measurement points, as well as perceived their QoL higher than non-regular users at 12 months follow-up.

We found no changes in SPH throughout the follow-up period, which is contrary to another study investigating SPH among healthy adults (3). One explanation to this may be that more than half of the participants (66.7%) in our study rated their SPH as high already at onset of fitness club membership, which caused less opportunity for further improvement. Also, very few (4%) rated their SPH fair or poor at onset. As such, the ceiling effect in SPH might be a cause for our results. Previous research on the association between exercise and SPH have primarily been done among sick or elderly populations, reporting that regular physical activity, and even a small dose of regular exercise (defined as engaging in activities more than once a week, in line with our definition of regular use of the gym) may improve SPH (34,35).

Precise definitions of QoL are scant and measures varies greatly (36). Still, research including systematic reviews and meta-analysis have suggested that regular exercise may enhance QoL and contribute to emotional wellbeing (15,16,36). This is consistent with the present study, where regular exercise at the fitness club was associated with higher scores in perceived QoL. Our data also give some support for a dose–response curve and a threshold of at least twice weekly to achieve benefits in SPH and QoL. However, we cannot conclude that exercise contributes to QoL, or if it is the other way around. We found, however, that QoL score

1  
2  
3 increased from onset of membership to 12 months follow-up, lending credibility to the  
4 hypothesis that improvement in QoL might be a key motivator for sustained exercise (37).  
5  
6 However, social and cognitive factors (such as social interactions while exercising, group  
7 cohesion and self-efficacy) may confound the association between regular use of a fitness  
8 club and QoL. In line with others, we believe that these factors might have a mediating role,  
9 rather than being real confounding factors (37,38).  
10  
11  
12  
13  
14  
15  
16  
17  
18

### 19 **Participants**

20  
21 Few participants managed to maintain long-term fitness club attendance, and there was a large  
22 drop in participants visiting the fitness club twice weekly or more from baseline to three  
23 (54%) six (67%) and 12 (72%) months. Others have also reported a drop-out rate from regular  
24 use of the fitness club around 50% within the first 6-12 months of membership (39,40). A  
25 retrospective study found that only 10% of fitness club members reported regular gym  
26 attendance (at least four visits monthly) after six months (41). In our study, this number was  
27 higher. Nevertheless, this shows that maintaining an active lifestyle can be challenging even  
28 for motivated individuals, and it highlight the need to develop strategies and interventions to  
29 facilitate exercise behavior in a fitness club setting. It may be useful to understand that regular  
30 exercise can contribute to increased SPH and QoL. Finding time is vital if regular use is to be  
31 adhered to. Even though most fitness clubs are located where people live and travel, have  
32 flexible opening hours, many also offering childcares, former physically inactive individuals  
33 may have had problems getting into a weekly routine (42).  
34  
35  
36  
37  
38  
39  
40  
41  
42  
43  
44  
45  
46  
47  
48  
49  
50  
51

### 52 **Outcomes**

53  
54 Both SPH and QoL were measured by a standardized electronic questionnaire at all time-  
55 points. The use of an electronic questionnaire based on previously validated surveys made it  
56  
57  
58  
59  
60

1  
2  
3 easy to gather responses quickly, and eliminate the costs associated with printing and  
4  
5 distributing paper-based questionnaires. Self-report is inexpensive, takes up little time to  
6  
7 conduct and is practical. Anyway, due to social desirability, the risk of over-reporting may be  
8  
9 high. For instance, individuals may report more socially acceptable answers rather than being  
10  
11 honest and may interpret the wording of questions differently (43). However, assessment of  
12  
13 SPH and QoL depends on the individual, subjective perception. Hence, self-report may be an  
14  
15 appropriate measurement method for measuring SPH and QoL.  
16  
17  
18  
19  
20

21 SPH was assessed by answering a global single question used in numerous other studies and  
22  
23 subjective assessment of health has been found to highly correlate with results of its objective  
24  
25 assessment and health status indices (44). QoL was measured by a Norwegian version of  
26  
27 SWLS which is considered to be a reliable and valid instrument and has been widely used to  
28  
29 examine the subjective QoL of people experiencing different health concerns (30,31).  
30  
31  
32  
33  
34

### 35 **Strengths and limitations**

36  
37 A strength of the present study was the use of a prospective study design with 12 months  
38  
39 follow-up. Also, inclusion of data concerning personal health behaviors (BMI and exercise)  
40  
41 and demographics (age, cohabitation, total household income, having children) is considered  
42  
43 strengths. Hence, we were able to adjust for these factors in the analyses. All participants  
44  
45 were untrained at study enrollment and may as such be considered representative for new  
46  
47 members at fitness clubs (22), as well as comparable to the general adult population (45).  
48  
49 There were equal number of men and women and we used valid and reliable measurement  
50  
51 methods (24,26). Despite a high dropout from the study itself, we had a sufficient number of  
52  
53 participants at all measurement points regarding a priori power calculation for SPH and QoL.  
54  
55  
56  
57  
58  
59  
60

1  
2  
3 Limitations were that the investigation was carried out in Norwegian only, excluding  
4 participants from other ethnic groups, as well as that attendance at the fitness club was self-  
5 reported. Studies are consistent in showing that individuals have a tendency to overestimate  
6 what they do (46,47). Nevertheless, if this was the case, the results of the present study  
7 provide a conservative calculation of exercise involvement at the fitness club. The  
8 questionnaire took approximately 30 minutes to complete and was answered electronically.  
9  
10 Such a time-consuming questionnaire might cause more losses to follow-up. Further,  
11 participation was voluntary, and it may be possible that the data contain a certain level of  
12 volunteer-bias, questioning the representativeness of the results.  
13  
14  
15  
16  
17  
18  
19  
20  
21  
22  
23  
24  
25

## 26 **Conclusion**

27  
28 We found an increase in all five statements in QoL and an improvement in QoL sum score,  
29 whereas no changes were observed in SPH the first year of fitness club membership. Our  
30 results add to the literature that regular attendance at a fitness club after 12 months was  
31 associated with a high SPH and QoL.  
32  
33  
34  
35  
36  
37  
38  
39

## 40 **Acknowledgments**

41  
42 The authors thank Ingar Holme and Morten Fagerland, professors in biostatistics, Norwegian  
43 School of Sports Sciences, for guidance with power considerations and statistical analysis.  
44  
45  
46  
47  
48  
49  
50  
51  
52  
53  
54  
55  
56  
57  
58  
59  
60

## Footnotes

- **Contributors** HH outlined the manuscript. CG plotted all data and developed the questionnaire together with LAHH. CG and LAHH were responsible for data collection and recruited the participants. HH, CG and LAHH did the testing. LAHH originated the idea for the present study and supervised the project. All authors participated in discussing the design of the study, read and corrected draft versions of the manuscript and approved the final manuscript.
  - **Competing interests** None declared.
  - **Funding** The project was financed by and conducted at the Norwegian School of Sports Sciences.
  - **Ethics approval** The project was reviewed by the Regional Committee for Medical and Health Research Ethics (REK 2015/1443 A), who concluded that, according to the Act on medical and health research (the Health Research Act 2008), the study did not require full review by REK. The project was approved by the Norwegian Social Science Data Service (NSD 44135).
  - **Data sharing statement** All data are fully available without restriction. Data are from the ‘Physical activity at fitness clubs. -A venue for public health’-study whose authors may be contacted at the Norwegian School of Sports Sciences. [Hege.heiestad@nih.no](mailto:Hege.heiestad@nih.no).
  - **Patient consent for publication** Not required.
-

## References:

1. World Health Organization. (2014). *Basic documents*. World Health Organization.
2. Falconer, J., & Quesnel-Vallée, A. (2017). Pathway from poor self-rated health to mortality: Explanatory power of disease diagnosis. *Social Science & Medicine*, *190*, 227-236.
3. Bamia, C., Orfanos, P., Juerges, H., Schöttker, B., Brenner, H., Lorbeer, R., ... & Lagiou, P. (2017). Self-rated health and all-cause and cause-specific mortality of older adults: Individual data meta-analysis of prospective cohort studies in the CHANCES Consortium. *Maturitas*, *103*, 37-44.
4. Barger, S. D., Cribbet, M. R., & Muldoon, M. F. (2016). Participant-reported health status predicts cardiovascular and all-cause mortality independent of established and nontraditional biomarkers: evidence from a representative US sample. *Journal of the American Heart Association*, *5*(9), e003741.
5. Bopp, M., Braun, J., Gutzwiller, F., Faeh, D., & Swiss National Cohort Study Group. (2012). Health risk or resource? Gradual and independent association between self-rated health and mortality persists over 30 years. *PloS one*, *7*(2), e30795.
6. Vingård, E., Alexanderson, K., & Norlund, A. (2004). Chapter 9. Consequences of being on sick leave. *Scandinavian journal of public health*, *32*(63\_suppl), 207-215
7. Miilunpalo, S., Vuori, I., Oja, P., Pasanen, M., & Urponen, H. (1997). Self-rated health status as a health measure: the predictive value of self-reported health status on the use of physician services and on mortality in the working-age population. *Journal of clinical epidemiology*, *50*(5), 517-528.
8. Chodzko-Zajko WJ, Proctor DN, Fiatarone Singh MA, Minson CT, Nigg CR, Salem GJ, et al. (2009). Exercise and physical activity for older adults. *Med Sci Sports Exerc* 2009;41(7):1510-1530.
9. World Health Organization. (1996). Health interview surveys: Towards international harmonization of methods and instruments (Vol. 58). Copenhagen, Denmark: World Health Organization Regional Office for Europe.
10. Lee, Y. (2000). The predictive value of self-assessed general, physical, and mental health on functional decline and mortality in older adults. *Journal of Epidemiology & Community Health*, *54*(2), 123-129.
11. Lera-Lopez, F., Ollo-López, A., Garrués-Irisarri, M. et al. *Eur J Ageing* (2019) 16:3.  
<https://doi.org/10.1007/s10433-018-0471-6>
12. Ref: Weinberg, R. S., & Gould, D. (2018). *Foundations of Sport and Exercise Psychology*, 7E. Human Kinetics. Ch18, p423-433
13. D. L., Hammond, C. C., Reifsteck, E. J., Jehu, C. M., Williams, R. A., Adams, M. M., ... & Shang, Y. T. (2013). Physical activity and quality of life. *Journal of Preventive Medicine and Public Health*, *46*(Suppl 1), S28.
14. Awick, E. A., Ehlers, D. K., Aguiñaga, S., Daugherty, A. M., Kramer, A. F., & McAuley, E. (2017). Effects of a randomized exercise trial on physical activity, psychological distress and quality of life in older adults. *General hospital psychiatry*, *49*, 44-50.
15. Gillison FB, Skevington SM, Sato A, Standage M, Evangelidou S. (2009). The effects of exercise interventions on quality of life in clinical and healthy populations: a meta-analysis. *Soc Sci Med* 2009; 68(9):1700-1710.
16. Bize R, Johnson JA, Plotnikoff RC. (2007). Physical activity level and health-related quality of life in the general adult population: a systematic review. *Prev Med* 2007;45(6):401-415.
17. Gill, D. L., Hammond, C. C., Reifsteck, E. J., Jehu, C. M., Williams, R. A., Adams, M. M., ... & Shang, Y. T. (2013). Physical activity and quality of life. *Journal of Preventive Medicine and Public Health*, *46*(Suppl 1), S28.
18. Cherry, K. (2018). Cross-sectional research method: How does it work. *Advantages and challenges. Student Resources*. Available online from: <https://www.verywellmind.com/cross-sectional-research-how-does-it-work>.
19. The International Health, R.S.A., *The IHRSA Global Report 2019*. (2019).
20. Sperandei, S., M.C. Vieira, and A.C. Reis. (2016). *Adherence to physical activity in an unsupervised setting: Explanatory variables for high attrition rates among fitness center members*. *Journal of Science and Medicine in Sport*, 2016. 19(11): p. 916-920.
21. Gjestvang, C., Stensrud, T., & Haakstad, L. A. (2019). Are changes in physical fitness, body composition and weight associated with exercise attendance and dropout among fitness club members? Longitudinal prospective study. *BMJ open*, *9*(4), e027987.
22. Gjestvang, C., Stensrud, T., & Haakstad, L. A. (2017). How is rating of perceived capacity related to VO2max and what is VO2max at onset of training?. *BMJ open sport & exercise medicine*, *3*(1), e000232.
23. Doblhammer, G., & Gumà, J. (Eds.). (2018). *A Demographic Perspective on Gender, Family and Health in Europe*. Springer International Publishing.
24. Machón, M., Vergara, I., Dorronsoro, M., Vrotsou, K., & Larrañaga, I. (2016). Self-perceived health in functionally independent older people: associated factors. *BMC geriatrics*, *16*(1), 66.



- 1  
2  
3 25. Girón, P. (2012). Is age associated with self-rated health among older people in Spain? *Central European journal of public health*, 20(3), 185.
- 4 26. Diener, E., Emmons, R. A., Larsen, R. J., & Griffin, S. (1985). The Satisfaction With Life Scale. *Journal of personality assessment*, 49(1), 71-75. doi: 10.1207/s15327752jpa4901\_13
- 5 27. Pavot, William, & Diener, Ed. (2008). The satisfaction with life scale and the emerging construct of life
- 6 28. Tessier, P., Blanchin, M., & Sébille, V. (2017). Does the relationship between health-related quality of life
- 7 29. Kobau, R., Sniezek, J., Zack, M. M., Lucas, R. E., & Burns, A. (2010). Well-being assessment: An
- 8 30. Clench-Aas, J., Nes, R. B., Dalgard, O. S., & Aarø, L. E. (2011). Dimensionality and measurement
- 9 31. Pavot, W., & Diener, E. (2009). Review of the satisfaction with life scale. In *Assessing well-being* (pp.
- 10 32. Vittersø, J. (2009). Satisfaction with life scale. *Tidsskrift for norsk psykologforening*, 46, 757-758.
- 11 33. Garber, C.E., et al. (2011). *American College of Sports Medicine position stand. Quantity and quality of*
- 12 34. Bherer, L., Erickson, K. I., & Liu-Ambrose, T. (2013). A review of the effects of physical activity and
- 13 35. Chapman, S. B., Aslan, S., Spence, J. S., DeFina, L. F., Keebler, M. W., Didehbani, N., & Lu, H. (2013).
- 14 36. Gillison, F. B., Skevington, S. M., Sato, A., Standage, M., & Evangelidou, S. (2009). The effects of
- 15 37. Segar, M. L., Eccles, J. S., & Richardson, C. R. (2011). Rebranding exercise: closing the gap between
- 16 38. Young, M. D., Plotnikoff, R. C., Collins, C. E., Callister, R., & Morgan, P. J. (2014). Social cognitive
- 17 39. Rustaden, A.M., et al., *Effects of BodyPump and resistance training with and without a personal trainer*
- 18 40. Middelkamp, J., et al., *The Effects of a Self-Efficacy Intervention on Exercise Behavior of Fitness Club*
- 19 41. Middelkamp, J., Van Rooijen, M., & Steenbergen, B. (2016). Attendance behavior of ex-members in
- 20 42. Masse, L.C., et al., *Understanding the mechanism of physical activity behavior change: Challenges and a*
- 21 43. Kaleta, D., Makowiec-Dąbrowska, T., Dziańkowska-Zaborszczyk, E., & Jegier, A. (2006). Physical
- 22 44. Caputo, A. (2017). Social desirability bias in self-reported well-being measures: Evidence from an online
- 23 45. Dumith, S. C., Hallal, P. C., Reis, R. S., & Kohl III, H. W. (2011). Worldwide prevalence of physical
- 24 46. Sallis, J. F., & Saelens, B. E. (2000). Assessment of physical activity by self-report: status, limitations, and
- 25 47. Schaller, A., Rudolf, K., Dejonghe, L., Grieben, C., & Froboese, I. (2016). Influencing factors on the
- 26 27 28 29 30 31 32 33 34 35 36 37 38 39 40 41 42 43 44 45 46 47 48 49 50 51 52 53 54 55 56 57 58 59 60

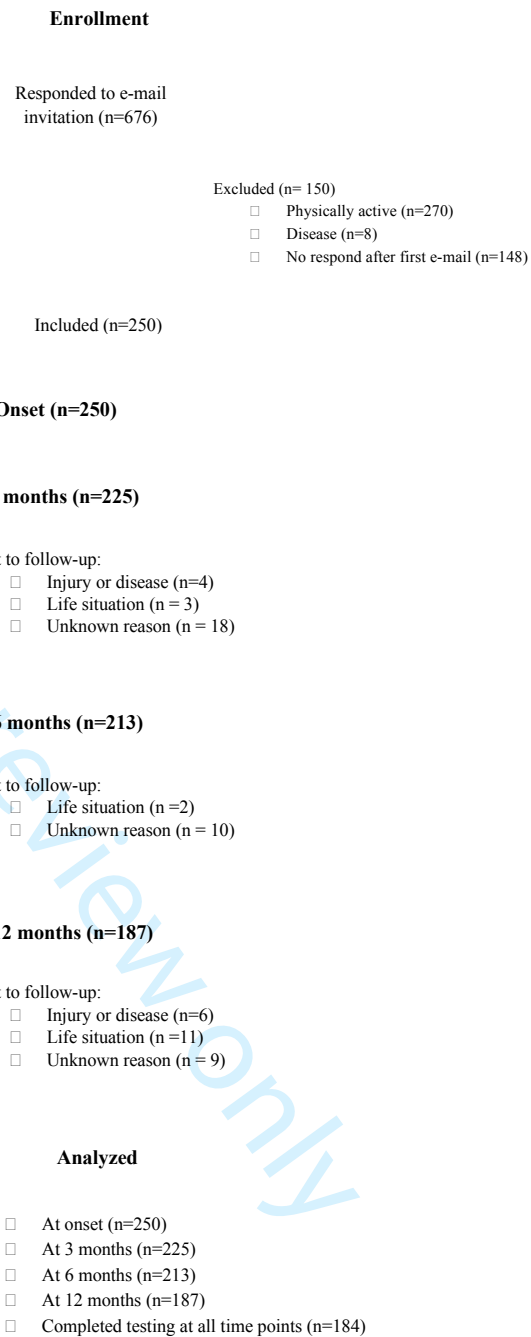

**Figure 1:** Flow diagram of the participants throughout the study.



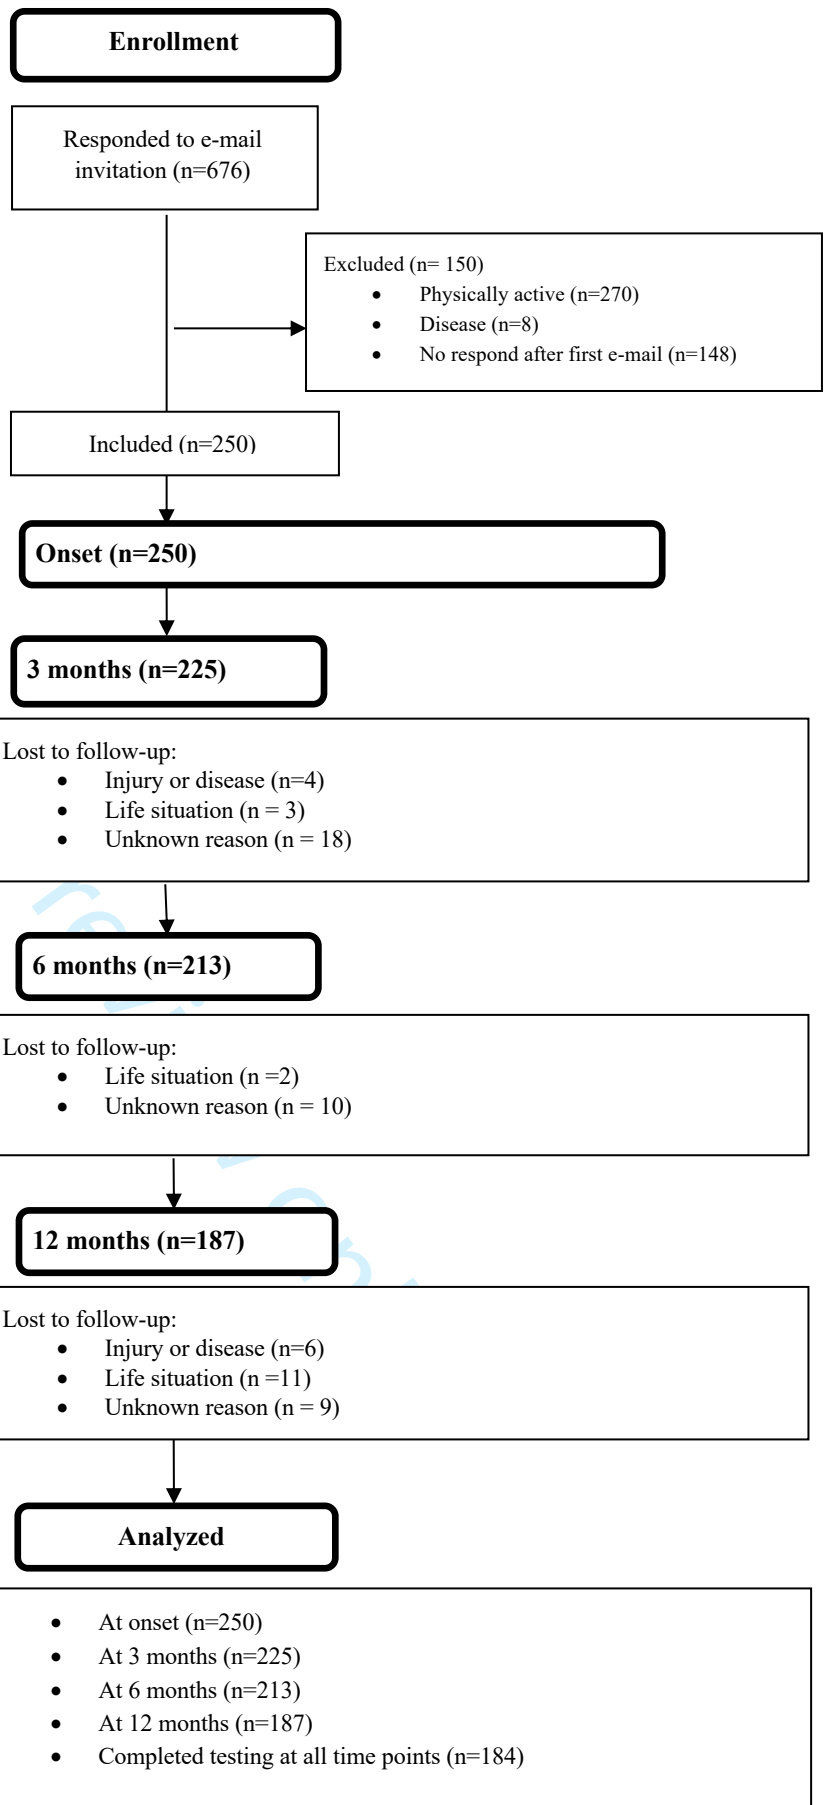

**Figure 1:** Flow diagram of the participants throughout the study.

STROBE Statement—Checklist of items that should be included in reports of *cross-sectional studies*

|                              | Item No | Recommendation                                                                                                                                                                                    | Page No        |
|------------------------------|---------|---------------------------------------------------------------------------------------------------------------------------------------------------------------------------------------------------|----------------|
| <b>Title and abstract</b>    | 1       | (a) Indicate the study's design with a commonly used term in the title or the abstract                                                                                                            | 4              |
|                              |         | (b) Provide in the abstract an informative and balanced summary of what was done and what was found                                                                                               | 2-3            |
| <b>Introduction</b>          |         |                                                                                                                                                                                                   |                |
| Background/rationale         | 2       | Explain the scientific background and rationale for the investigation being reported                                                                                                              | 4-5            |
| Objectives                   | 3       | State specific objectives, including any prespecified hypotheses                                                                                                                                  | 5              |
| <b>Methods</b>               |         |                                                                                                                                                                                                   |                |
| Study design                 | 4       | Present key elements of study design early in the paper                                                                                                                                           | 3              |
| Setting                      | 5       | Describe the setting, locations, and relevant dates, including periods of recruitment, exposure, follow-up, and data collection                                                                   | 6              |
| Participants                 | 6       | (a) Give the eligibility criteria, and the sources and methods of selection of participants                                                                                                       | 6              |
| Variables                    | 7       | Clearly define all outcomes, exposures, predictors, potential confounders, and effect modifiers. Give diagnostic criteria, if applicable                                                          | 7-8            |
| Data sources/<br>measurement | 8*      | For each variable of interest, give sources of data and details of methods of assessment (measurement). Describe comparability of assessment methods if there is more than one group              | 6-8            |
| Bias                         | 9       | Describe any efforts to address potential sources of bias                                                                                                                                         |                |
| Study size                   | 10      | Explain how the study size was arrived at                                                                                                                                                         | 6-7            |
| Quantitative variables       | 11      | Explain how quantitative variables were handled in the analyses. If applicable, describe which groupings were chosen and why                                                                      | 7-8            |
| Statistical methods          | 12      | (a) Describe all statistical methods, including those used to control for confounding                                                                                                             | 9              |
|                              |         | (b) Describe any methods used to examine subgroups and interactions                                                                                                                               | 9              |
|                              |         | (c) Explain how missing data were addressed                                                                                                                                                       | 9              |
|                              |         | (d) If applicable, describe analytical methods taking account of sampling strategy                                                                                                                |                |
|                              |         | (e) Describe any sensitivity analyses                                                                                                                                                             |                |
| <b>Results</b>               |         |                                                                                                                                                                                                   |                |
| Participants                 | 13*     | (a) Report numbers of individuals at each stage of study—eg numbers potentially eligible, examined for eligibility, confirmed eligible, included in the study, completing follow-up, and analysed | 9 and Figure 1 |
|                              |         | (b) Give reasons for non-participation at each stage                                                                                                                                              | Figure 1       |
|                              |         | (c) Consider use of a flow diagram                                                                                                                                                                | Figure 1       |
| Descriptive data             | 14*     | (a) Give characteristics of study participants (eg demographic, clinical, social) and information on exposures and potential confounders                                                          | 10             |
|                              |         | (b) Indicate number of participants with missing data for each variable of interest                                                                                                               | Table 2-3      |
| Outcome data                 | 15*     | Report numbers of outcome events or summary measures                                                                                                                                              | 10-11          |
| Main results                 | 16      | (a) Give unadjusted estimates and, if applicable, confounder-adjusted estimates and their precision (eg, 95% confidence interval). Make                                                           | 10-13          |

|                          |    |                                                                                                                                                                            |       |
|--------------------------|----|----------------------------------------------------------------------------------------------------------------------------------------------------------------------------|-------|
|                          |    | clear which confounders were adjusted for and why they were included                                                                                                       |       |
|                          |    | (b) Report category boundaries when continuous variables were categorized                                                                                                  |       |
|                          |    | (c) If relevant, consider translating estimates of relative risk into absolute risk for a meaningful time period                                                           |       |
| Other analyses           | 17 | Report other analyses done—eg analyses of subgroups and interactions, and sensitivity analyses                                                                             | 10-13 |
| <b>Discussion</b>        |    |                                                                                                                                                                            |       |
| Key results              | 18 | Summarise key results with reference to study objectives                                                                                                                   | 14    |
| Limitations              | 19 | Discuss limitations of the study, taking into account sources of potential bias or imprecision. Discuss both direction and magnitude of any potential bias                 | 17    |
| Interpretation           | 20 | Give a cautious overall interpretation of results considering objectives, limitations, multiplicity of analyses, results from similar studies, and other relevant evidence | 14-17 |
| Generalisability         | 21 | Discuss the generalisability (external validity) of the study results                                                                                                      | 16    |
| <b>Other information</b> |    |                                                                                                                                                                            |       |
| Funding                  | 22 | Give the source of funding and the role of the funders for the present study and, if applicable, for the original study on which the present article is based              | 6     |

\*Give information separately for exposed and unexposed groups.

**Note:** An Explanation and Elaboration article discusses each checklist item and gives methodological background and published examples of transparent reporting. The STROBE checklist is best used in conjunction with this article (freely available on the Web sites of PLoS Medicine at <http://www.plosmedicine.org/>, Annals of Internal Medicine at <http://www.annals.org/>, and Epidemiology at <http://www.epidem.com/>). Information on the STROBE Initiative is available at [www.strobe-statement.org](http://www.strobe-statement.org).

# BMJ Open

## Investigating Self-Perceived Health and Quality of Life; -a longitudinal prospective study among new beginner exercisers in a fitness club setting

|                                 |                                                                                                                                                                                                                      |
|---------------------------------|----------------------------------------------------------------------------------------------------------------------------------------------------------------------------------------------------------------------|
| Journal:                        | <i>BMJ Open</i>                                                                                                                                                                                                      |
| Manuscript ID                   | bmjopen-2019-036250.R1                                                                                                                                                                                               |
| Article Type:                   | Original research                                                                                                                                                                                                    |
| Date Submitted by the Author:   | 18-Mar-2020                                                                                                                                                                                                          |
| Complete List of Authors:       | Heiestad, Hege; Norwegian School of Sports Science<br>Gjestvang, Christina; Norwegian School of Sports Sciences, Department of Sports Medicine<br>Haakstad, Lene; Norwegian School of Sport Sciences, Sport Medicine |
| <b>Primary Subject Heading</b>: | Sports and exercise medicine                                                                                                                                                                                         |
| Secondary Subject Heading:      | Public health                                                                                                                                                                                                        |
| Keywords:                       | SPORTS MEDICINE, PUBLIC HEALTH, MENTAL HEALTH                                                                                                                                                                        |
|                                 |                                                                                                                                                                                                                      |

SCHOLARONE™  
Manuscripts



I, the Submitting Author has the right to grant and does grant on behalf of all authors of the Work (as defined in the below author licence), an exclusive licence and/or a non-exclusive licence for contributions from authors who are: i) UK Crown employees; ii) where BMJ has agreed a CC-BY licence shall apply, and/or iii) in accordance with the terms applicable for US Federal Government officers or employees acting as part of their official duties; on a worldwide, perpetual, irrevocable, royalty-free basis to BMJ Publishing Group Ltd ("BMJ") its licensees and where the relevant Journal is co-owned by BMJ to the co-owners of the Journal, to publish the Work in this journal and any other BMJ products and to exploit all rights, as set out in our [licence](#).

The Submitting Author accepts and understands that any supply made under these terms is made by BMJ to the Submitting Author unless you are acting as an employee on behalf of your employer or a postgraduate student of an affiliated institution which is paying any applicable article publishing charge ("APC") for Open Access articles. Where the Submitting Author wishes to make the Work available on an Open Access basis (and intends to pay the relevant APC), the terms of reuse of such Open Access shall be governed by a Creative Commons licence – details of these licences and which [Creative Commons](#) licence will apply to this Work are set out in our licence referred to above.

Other than as permitted in any relevant BMJ Author's Self Archiving Policies, I confirm this Work has not been accepted for publication elsewhere, is not being considered for publication elsewhere and does not duplicate material already published. I confirm all authors consent to publication of this Work and authorise the granting of this licence.

1  
2  
3 **Investigating Self-Perceived Health and Quality of Life; -a longitudinal prospective**  
4  
5 **study among new beginner exercisers in a fitness club setting**  
6  
7  
8  
9  
10

11 Hege Heiestad, Physical therapist, exercise scientist, MSc

12 Norwegian School of Sports Sciences, Department of Sports Medicine, Oslo, Norway

13 (E-mail: [hege.heiestad@nih.no](mailto:hege.heiestad@nih.no))  
14  
15  
16  
17  
18  
19  
20

21 Christina Gjestvang, Ph.D. student, exercise scientist, MSc

22 Norwegian School of Sports Sciences, Department of Sports Medicine, Oslo, Norway

23 (E-mail: [christina.gjestvang@nih.no](mailto:christina.gjestvang@nih.no))  
24  
25  
26  
27  
28  
29  
30

31 Lene A. H. Haakstad, Associate professor, exercise scientist, MSc, PhD

32 Norwegian School of Sports Sciences, Department of Sports Medicine, Oslo, Norway

33 (E-mail: [lahaakstad@nih.no](mailto:lahaakstad@nih.no))  
34  
35  
36  
37  
38  
39  
40  
41  
42

43 **Correspondent author**

44 Hege Heiestad

45 Norwegian School of Sport Sciences

46 Department of Sports Medicine

47 P.O Box 4014, Ullevål Stadion

48 0806 Oslo, Norway

49 Tlf. +47 92 23 93 04

50 E-mail: [hege.heiestad@nih.no](mailto:hege.heiestad@nih.no)  
51  
52  
53  
54  
55  
56  
57  
58  
59  
60

## ABSTRACT

**Objectives:** This study investigated SPH and QoL at onset and after three, six and 12 months of fitness club membership. Also, we compared SPH and QoL between those who reported regular use of the fitness club ( $\geq$  two exercise sessions/week the last month) with those who did not (one exercise session/week, or no exercise the last month).

**Design:** Longitudinal prospective study.

**Setting:** 25 fitness clubs in Oslo, Norway.

**Participants:** In total, 250 newly registered fitness club members (equal numbers of men and women, mean age=36.4 $\pm$ 11.3 years, mean BMI=25.7 $\pm$ 4.4) were recruited. At onset (n=250), after three (n=225), six (n=213) and 12 months (n=187), the participants answered an electronic questionnaire, covering background variables, exercise involvement, perceived SPH and QoL.

**Outcome measures:** SPH was measured by a single item question, rating health status from poor to excellent on a five-point scale. High SPH was dichotomized as excellent or good, and low SPH as moderate, fair or poor. QoL was measured on a 7-item scale, rating five statements and dichotomized according to a total max sum score of 35, with low QoL $\leq$  25 and high QoL $>$ 25.

**Results:** Repeated measurements did not show any changes in SPH. In QoL, we observed an improvement in QoL sum score and a significant increase in mean scores for two out of five statements at 12 months follow-up: “*In most ways, my life is close to my ideal*” (p=0.036) and “*If I could live my life over, I would change almost nothing*” (p<0.001). Regular use of the fitness club was associated with high SPH (OR 3.532 [95% CI 1.60 to 7.82], p=0.002) and high QoL (OR1.914 [95% CI 0.95 to 3.86], p=0.069). The results were unchanged after adjusting for confounders.

**Conclusions:** Regular attendance at a fitness club was associated with high SPH and high

1  
2  
3 QoL at 12 months follow-up.  
4  
5  
6

7  
8 **STRENGTHS AND LIMITATIONS OF THIS STUDY**  
9

- 10
- 11 • The use of prospective study design with 12 months follow-up.
  - 12 • Valid and reliable measurement methods.
  - 13
  - 14 • The use of an electronic questionnaire based on previously validated surveys.
  - 15
  - 16
  - 17 • Self-reported attendance at the fitness club.
  - 18
  - 19
  - 20
  - 21
  - 22
  - 23
  - 24
  - 25
  - 26
  - 27
  - 28
  - 29
  - 30
  - 31
  - 32
  - 33
  - 34
  - 35
  - 36
  - 37
  - 38
  - 39
  - 40
  - 41
  - 42
  - 43
  - 44
  - 45
  - 46
  - 47
  - 48
  - 49
  - 50
  - 51
  - 52
  - 53
  - 54
  - 55
  - 56
  - 57
  - 58
  - 59
  - 60



## INTRODUCTION

According to the World Health Organization (1), health is not only the absence of somatic disease but also includes mental and social well-being, putting emphasis on the usefulness and need for investigating individuals' self-perception of overall health (SPH). Up to date, several studies have shown that low SPH may be a valid and robust predictor of morbidity and mortality of various diseases, such as cancer, cardiovascular disease, stress, diabetes and other chronic health conditions (2-5). Low SPH is as well associated with being sick-listed and frequent use of health care services (6,7). In different patient groups and among the elderly population, SPH has widely been used to evaluate the effect of health-care programs (8). The measure is a single-item question, including rating of health status from poor to excellent on a five-point scale, and as such popular for its simplicity and cost-effectiveness (9).

It is growing interest in the assessment of physical activity on modification of SPH, and studies have indicated a strong association between insufficient physical activity and lower SPH in adults, especially in older individuals (10,11). However, it is important to investigate SPH not only between individuals that are active or inactive according to current physical activity recommendations (12), but also if this differs between activity contexts (organized sports clubs, public spaces and fitness clubs) and exercise involvement (frequency, duration, intensity, and modes) (13).

Quality of life (QoL) has also become an important measurement because it is a meaningful indicator of both mental and physical well-being (14,15), and its positive association with physical activity has been consistently reported in the systematic reviews and meta-analyses (16,17). Although there is limited data, it is suggested that QoL may be a key motivator for

1  
2  
3 regular physical activity and exercise (18), meaning that individuals start and continue to be  
4  
5 active because this contributes to their QoL. However, cross-sectional data precludes a  
6  
7 conclusion regarding the nature of this association (19).  
8  
9

10  
11  
12 Throughout the 1990s, a new venue for physical activity and exercise gradually grew in  
13  
14 popularity, the fitness clubs. Worldwide, the fitness club industry has about 183 million  
15  
16 members and counts more than 210 000 clubs (20). Those who join a fitness club may be  
17  
18 initially motivated to exercise, still, previous studies have shown a high dropout-rate after  
19  
20 only three months (21,22). This shows that maintaining regular exercise can be challenging  
21  
22 even for motivated individuals. Even though this arena has become a large and growing venue  
23  
24 for activity, the scientific knowledge of those that choose to be a member is scant. Research  
25  
26 has not yet investigated how fitness club membership relates to SPH and QoL-status among  
27  
28 beginner recreational exercisers. Hence, the primary aim of the present study was to report  
29  
30 longitudinal data of SPH and QoL in an age-diverse group of men and women across the first  
31  
32 year of fitness club membership. Secondary, we wanted to examine if SPH and QoL differed  
33  
34 between those who reported regular use of the fitness club ( $\geq$  two exercise sessions/week the  
35  
36 last month) with those who did not (one exercise session/week, or no exercise the last month).  
37  
38  
39  
40  
41  
42  
43  
44  
45  
46  
47  
48  
49  
50  
51  
52  
53  
54  
55  
56  
57  
58  
59  
60

## MATERIALS AND METHODS

### Study design and population

This is a secondary analysis of data collected as part of the research project “Fitness clubs - a venue for public health?” (22-25), a longitudinal prospective study, aiming to investigate which factors that influence exercise adherence in beginner recreational exercisers.

The project was reviewed by the Regional Committee for Medical and Health Research Ethics (REK 2015/1443 A), who concluded, according to the act on medical and health research (the Health Research Act 2008), the study did not require full review by REK. The procedures followed the World Medical Association Declaration of Helsinki and were approved by the Norwegian Social Science Data Service (NSD 44135), financed and conducted at the Norwegian School of Sport Sciences (NSSS) (October 2015 - November 2018). No economic compensation was given to the participants.

New members at 25 fitness clubs in Oslo, Norway were contacted by an e-mail invitation. At first contact, the aims and implications of the study were explained, and the eligibility criteria checked. Enrollment was limited to adults ( $\geq 18$  years), <four weeks membership, healthy (no disease considered to hinder physical activity, e.g., severe heart disease or hypertension), and physically inactive (exercising <60 min/week at a moderate or vigorous intensity or brisk walking <150 min/week, the last six months) (12,26).

Sample size considerations for SPH and QoL was done together with a professor in biostatistics at NSSS, based on findings in other studies (27-29). When an individual starts exercising, it may be that small changes occur in QoL, such as going from 23 (low QoL) to 26 (high QoL) on the total sum score for QoL (35 points). It was estimated that with 70

1  
2  
3 participants, we would be able to detect a 10% change in QoL over a one-year follow-up  
4  
5 period. Similarly, with a power of 80% at the 0.05 level, we would be able to identify small  
6  
7 changes in SPH, such as going from three to four on the five-point Likert-scale, with 93  
8  
9 participants. To account for losses to follow-up and be able to do subgroup analyses, we  
10  
11 aimed to recruit all individuals who fulfilled the eligibility criteria. In total, 676 fitness club  
12  
13 members wanted to participate in the study. We excluded those who already exercised  
14  
15 regularly (n=270) or had cardiovascular disease, hypertension or asthma (n=8). Besides,  
16  
17 148 individuals did not respond after the first e-mail, leaving 250 enrolling in the study  
18  
19 (Figure 1).  
20  
21  
22  
23  
24  
25

### 26 **Patient and Public involvement**

27  
28 Four volunteers completed a pilot test of the whole electronic questionnaire, which led to  
29  
30 minor changes in wording and format. Otherwise, participants and the public have not been  
31  
32 involved in the development of research questions, study design or recruitment.  
33  
34  
35  
36  
37

### 38 **Data-collection and measurements**

39  
40 A standardized electronic questionnaire was answered at onset and after three, six and 12  
41  
42 months' fitness club membership. A pretest of the questionnaire was conducted by four  
43  
44 members in the research group, as well as four volunteers. The final questionnaire contained  
45  
46 52 questions at onset and 65 questions at three, six and 12 months. At all time-points, the  
47  
48 questionnaire took approximately 30 minutes to complete and was answered electronically.  
49  
50  
51  
52

53  
54 SPH was assessed by answering a global single question: "*In general, how would you rate*  
55  
56 *your health today?*". The response options were ranked from 1-5, with the following  
57  
58 description: excellent, good, moderate, fair and poor. According to these five levels, we also  
59  
60

1  
2  
3 divided the participants into two categories: high SPH (excellent and good) and low SPH  
4  
5 (moderate, fair and poor) to investigate the association between SPH and exercise behavior,  
6  
7 an approach adopted by other researchers (30,31).  
8  
9

10  
11  
12 QoL was measured by a Norwegian version of the Satisfaction of Life Scale (SWLS) (32).

13  
14 Because of multiple assessment-points, and a comprehensive questionnaire covering several  
15  
16 factors influencing exercise adherence (22-25), we decided after discussion in the project  
17  
18 group to use SWLS. The SWLS is shorter and includes five statements only. Several studies  
19  
20 have also supported the validity and reliability of the scale (33-36). QoL is measured on a 7-  
21  
22 item scale, where the participants rate five different statements from “strongly disagree” =  
23  
24 1 to “strongly agree” = 7:  
25  
26

- 27  
28 1. *“In most ways, my life is close to my ideal”*
- 29  
30 2. *“The conditions of my life are excellent”*
- 31  
32 3. *“I am satisfied with my life”*
- 33  
34 4. *“So far I have gotten the important things I want in life”*
- 35  
36 5. *“If I could live my life over, I would change almost nothing”*  
37  
38  
39  
40  
41

42  
43 The results from QoL were analyzed separately for each statement and as a sum score (28,37-  
44  
45 39), and we also dichotomized QoL into two main groups; low QoL (scores 5-25) and high  
46  
47 QoL (scores 26-35).  
48  
49

50  
51 To examine the role of regular exercise on SPH and QoL, we asked the participants to report  
52  
53 exercise involvement at the fitness club in the last four weeks: 1) *“Have you been a*  
54  
55 *member?”*: “yes” or “no”, 2) *“Have you been exercising regularly?”*: “yes” or “no”, 3) *“How*  
56  
57 *often have you exercised per week on average?”*: “once a week”, “twice a week”, “three times  
58  
59  
60

1  
2  
3 a week", "four times a week", "five times a week", "six times a week" or "seven times a week  
4  
5 or more". Regular use of the fitness club was defined as exercising  $\geq$  two times a week,  
6  
7 whereas non-regular use was defined as one exercise session/week, or no exercise the last  
8  
9 month (12). Information related to demographic variables and socioeconomic status were  
10  
11 obtained from the questionnaire answered at onset, covering age, gender, body weight, level  
12  
13 of education, total household income, cohabitation, children and occupation.  
14  
15  
16  
17  
18

### 19 **Statistical analyses**

20  
21 Statistical Package for the Social Sciences (SPSS) – 25.0 for Windows was used for statistical  
22  
23 analysis. Data are presented as numbers with percentages or means with standard deviations  
24  
25 (SD), as well as Odds Ratio (OR) with 95% Confidence Intervals (CI) and p-values.  
26  
27

28 Chronbach's  $\alpha$  for the SWLS was 0.87, 0.91, 0.90 and 0.91 at baseline, and after three, six  
29  
30 and 12 months, respectively. Chi-square analysis was used to compare categorical variables  
31  
32 and two-sided independent sample t-test for continuous variables (Table 1). In addition, Mc  
33  
34 Nemars test, Cochran's Q, paired sample t-test and one way repeated measure ANOVA were  
35  
36 used to analyze changes in SPH and QoL. Data (Table 2 and 3) are reported for participants  
37  
38 who completed the questionnaire at onset of fitness club membership (n=250), three months  
39  
40 (n=225), six months (n=213) and 12 months (n=187), whereas p-values are shown for  
41  
42 participants that completed the questionnaire at all measurements points only (n=184). Also,  
43  
44 due to the ethics of mandatory questionnaire responses, we included "I do not want to  
45  
46 answer" or "Not relevant" as response options, which in the SPSS data set were treated as  
47  
48 missing values, so individual questions may have varying response rates.  
49  
50  
51  
52  
53  
54  
55

56 To assess the difference between those who reported regular use of the fitness club (n=70),  
57  
58 with those who did not (n=93) on SPH and QoL, we included prospective data obtained at 12  
59  
60

1  
2  
3 months (Table 4). Based on crude analysis comparing demographic and health factors  
4  
5 between high and low SPH, and high and low QoL, all seven variables (exercise, age,  
6  
7 cohabitation, total household income, Body Mass Index (BMI), children and gender) with p-  
8  
9 values  $\leq 0.05$  (Table 1), were all entered in the above order in the adjusted model (Table 5)  
10  
11  
12 (40-42).  
13  
14  
15  
16  
17  
18  
19  
20  
21  
22  
23  
24  
25  
26  
27  
28  
29  
30  
31  
32  
33  
34  
35  
36  
37  
38  
39  
40  
41  
42  
43  
44  
45  
46  
47  
48  
49  
50  
51  
52  
53  
54  
55  
56  
57  
58  
59  
60

For peer review only

## RESULTS

General characteristic of all participants at onset of fitness club membership, divided into high and low SPH and QoL, is shown in Table 1. In total, 66.4% and 35.2% rated their SPH and QoL as high, respectively. There were no gender differences concerning SPH, but more women (41.9%) than men (28.8%) rated their QoL as high. The high SPH group had lower age, mean BMI and fewer were overweight or obese compared with the low SPH group.

Participants with high QoL had higher age and were more likely to report high total household income, living with a partner and having children than the low QoL group (Table 1).

**Table 1:** General characteristics of the participants at onset of fitness club membership, divided into high and low SPH and QoL (n=250).

| Background variable                                | All<br>(n=250) | SPH<br>High<br>(n=166) | Low<br>(n=83) | p-value | QoL<br>High<br>(n=88) | Low<br>(n=161) | p-value |
|----------------------------------------------------|----------------|------------------------|---------------|---------|-----------------------|----------------|---------|
| Norwegian descent [n (%)]                          | 196 (78.4)     | 134 (80.7)             | 62 (74.7)     | 0.630   | 65 (73.9)             | 130 (80.7)     | 0.428   |
| Gender: Men [n (%)]                                | 125 (50.0)     | 83 (50.0)              | 42 (50.6)     | 1.000   | 36 (40.9)             | 89 (55.3)      | 0.042   |
| Age (years) [mean (SD) ]                           | 36.4 (11.3)    | 34.5 (10.5)            | 40.1 (11.9)   | <0.001  | 38.5 (12.1)           | 35.2(10.6)     | 0.027   |
| Age ≥ 40 years [n (%)]                             | 81             | 43                     | 37            | 0.010   | 33                    | 47             | 0.230   |
| BMI [mean (SD)]                                    | 25.7 (4.4)     | 25.2 (4.0)             | 26.6 (5.0)    | 0.017   | 25.3 (4.1)            | 25.9 (4.5)     | 0.263   |
| BMI ≥ 25 (overweight or obese) [n (%)]             | 121 (48.4)     | 72 (43.4)              | 48 (57.8)     | 0.044   | 36 (40.9)             | 85 (52.8)      | 0.097   |
| Education level:<br>University ≥ 4 years [n (%)]   | 102 (40.8)     | 66 (39.8)              | 36 (44.4)     |         | 40 (45.5)             | 61 (37.9)      | 0.304   |
| Total household income:<br>High > 87 500\$ [n (%)] | 114 (45.6)     | 74 (47.4)              | 40 (51.3)     |         | 51 (62.2)             | 62 (40.8)      | 0.003   |
| Living with a partner [n (%)]                      | 153 (61.2)     | 102 (61.4)             | 50 (60.2)     | 0.963   | 70 (79.5)             | 82 (50.9)      | <0.001  |
| Children                                           | 80 (32)        | 50 (31.1)              | 29 (34.9)     | 0.531   | 36 (40.9)             | 44 (27.3)      | 0.040   |
| Employed outside of home [n (%)]                   | 185 (74.0)     | 120 (72.3)             | 64 (77.1)     | 0.134   | 63 (71.6)             | 122 (75.8)     | 0.142   |



At onset, more men than women had a household income  $\geq$ 87 500 US dollar (52.0% versus 39.2%), worked outside the home (86.4% versus 61.6%), were overweight or obese (BMI  $\geq$ 25 kg/m<sup>2</sup>, 58.4% versus 38.7%) and older (38.5 years versus 34.3 years). More details of the study participants have been published previously (22-25). Throughout the initial year of fitness club membership, we found no changes in SPH (Table 2).

**Table 2:** SPH at onset, three, six and 12 months of fitness club membership. Results are shown in mean and standard deviation (SD) or numbers (n) and %. P-values are shown for participants that completed the questionnaire at all measurement points (n=184).

| Outcomes            | Onset<br>n=249<br>(men=125,<br>women=124) | Three months<br>n=225<br>(men=109,<br>women=116) | Six months<br>n=213<br>(men=106,<br>women=107) | 12 months<br>n=187<br>(men=96,<br>women=91) | p-value |
|---------------------|-------------------------------------------|--------------------------------------------------|------------------------------------------------|---------------------------------------------|---------|
| <b>SPH:</b>         |                                           |                                                  |                                                |                                             |         |
| Mean score (SD)     | 2.3 (0.7)                                 | 2.2 (0.8)                                        | 2.1 (0.7)                                      | 2.2 (0.7)                                   | 0.313   |
| High SPH [n (%)]    | 166 (66.7)                                | 158 (70.2)                                       | 158 (74.2)                                     | 128 (68.4)                                  | 0.359   |
| Low SPH n [(%)]     | 83 (33.3)                                 | 67 (29.8)                                        | 55 (25.8)                                      | 59 (31.6)                                   |         |
| - Excellent [n (%)] | 31 (12.4)                                 | 31 (13.8)                                        | 37 (17.4)                                      | 27 (14.4)                                   | 0.532   |
| - Good [n (%)]      | 135 (54.0)                                | 127 (56.4)                                       | 121 (56.8)                                     | 101 (54.0)                                  | 0.841   |
| - Moderate [n (%)]  | 73 (29.2)                                 | 54 (24)                                          | 48 (22.5)                                      | 51 (27.3)                                   | 0.430   |
| - Fair [n (%)]      | 8 (3.2)                                   | 11 (4.9)                                         | 6 (2.8)                                        | 8 (4.3)                                     | 0.943   |
| - Poor [n (%)]      | 2 (0.8)                                   | 2 (0.9)                                          | 1 (0.5)                                        | 0 (0.0)                                     | 0.300   |

In QoL measurements, we observed an increase in mean scores for all five statements, a significant increase in two out of five statements: “*In most ways, my life is close to my ideal*” (p=0.036) and “*If I could live my life over, I would change almost nothing*” (p<0.001), and also an improvement in sum score (p = 0.071) (Table 3).

**Table 3:** QoL at onset, three, six and 12 months of fitness club membership. Results are shown in mean and standard deviation (SD) or numbers (n) and %. P-value is shown for participants that completed the questionnaire at all measurement points (n=184).

| Outcomes                                                                  | Onset<br>n=249<br>(men=125,<br>women=124) | Three months<br>n=225<br>(men=109,<br>women=116) | Six months<br>n=213<br>(men=106,<br>women=107) | 12 months<br>n=187<br>(men=96,<br>women=91) | p-value                                                                                            |
|---------------------------------------------------------------------------|-------------------------------------------|--------------------------------------------------|------------------------------------------------|---------------------------------------------|----------------------------------------------------------------------------------------------------|
| <b>QoL:</b>                                                               |                                           |                                                  |                                                |                                             |                                                                                                    |
| Sum score QoL [mean (SD)]                                                 | 22.2(6.7)                                 | 22.2(7.1)                                        | 22.5(6.9)                                      | 23.2(6.8)                                   | 0.071                                                                                              |
| High QoL [n (%)]                                                          | 88 (35.3)                                 | 76 (34.2)                                        | 79 (37.1)                                      | 76 (41.1)                                   | 0.263                                                                                              |
| Low QoL [n (%)]                                                           | 161 (64.7)                                | 146 (65.8)                                       | 134 (62.9)                                     | 109 (58.9)                                  |                                                                                                    |
| «In most ways my life is close to my ideal» [mean (SD)]                   | 4.1 (1.5)                                 | 4.3 (1.6)                                        | 4.3 (1.6)                                      | 4.4 (1.6)                                   | 0.036<br>(onset to 12 months;<br>p=0.025)                                                          |
| «The conditions of my life are excellent» [mean (SD)]                     | 4.7 (1.5)                                 | 4.7 (1.5)                                        | 4.7 (1.5)                                      | 4.8 (1.5)                                   | 0.356                                                                                              |
| «I am satisfied with my life» [mean (SD)]                                 | 4.9 (1.6)                                 | 4.8 (1.6)                                        | 4.9 (1.5)                                      | 5.0 (1.5)                                   | 0.216                                                                                              |
| «So far I have gotten the important things I want in life» [mean (SD)]    | 4.5 (1.7)                                 | 4.4 (1.7)                                        | 4.5 (1.6)                                      | 4.7 (1.6)                                   | 0.068                                                                                              |
| «If I could live my life over, I would change almost nothing» [mean (SD)] | 4.0 (1.9)                                 | 4.0 (1.8)                                        | 4.1 (1.8)                                      | 4.3 (1.8)                                   | <0.001<br>(onset to 12 months;<br>p<0.001, 3 to 12<br>months; p=0.001, 6 to<br>12 months; p=0.001) |

At all measurements, regular use of the fitness club was associated with high SPH, as well as higher sum scores on QoL at 12 months follow-up (Table 4). There was a large drop in participants visiting the fitness club twice weekly or more from baseline to three (54%), six (67%) and 12 (72%) months. More details of exercise behavior at the gym are previously reported (22-25).

**Table 4:** SPH and QoL compared in participants reporting regular and non-regular use at a fitness center at three, six and 12 months. Results are shown in mean and standard deviation (SD) or numbers (n) and %.

|                           | Three months        |                         |         | Six months         |                         |         | 12 months          |                        |         |
|---------------------------|---------------------|-------------------------|---------|--------------------|-------------------------|---------|--------------------|------------------------|---------|
|                           | Regular use (n=116) | Non-regular use (n=106) | p-value | Regular use (n=82) | Non-regular use (n=125) | p-value | Regular use (n=70) | Non-regular use (n=93) | p-value |
| <b>SPH:</b>               |                     |                         |         |                    |                         |         |                    |                        |         |
| Mean score (SD)           | 2.1 (0.7)           | 2.4 (0.8)               | 0.001   | 1.9 (0.7)          | 2.3 (0.8)               | 0.001   | 1.9 (0.7)          | 2.4 (0.7)              | <0.001  |
| High SPH [n (%)]          | 91 (78.4)           | 67 (63.2)               | 0.018   | 69 (84.1)          | 85 (68.0)               | 0.015   | 59 (84.3)          | 57 (61.3)              | 0.002   |
| Low SPH [n (%)]           | 25 (21.6)           | 39 (36.7)               |         | 13 (15.8)          | 40 (32.0)               |         | 11 (15.8)          | 36 (38.7)              |         |
| <b>QoL:</b>               |                     |                         |         |                    |                         |         |                    |                        |         |
| Sum score QoL [mean (SD)] | 22.5 (6)            | 21.8 (7.6)              | 0.469   | 22.6 (7.2)         | 22.5 (6.8)              | 0.954   | 25.1 (5.5)         | 22.0(7.0)              | 0.002   |
| High QoL [n (%)]          | 39 (34.2)           | 36 (34.0)               | 1.000   | 36 (43.9)          | 42 (33.6)               | 0.177   | 34 (49.3)          | 34 (36.6)              | 0.144   |
| Low QoL [n (%)]           | 75 (65.8%)          | 70 (66.0)               |         | 46 56.1)           | 83 (66.4)               |         | 35 (50.7)          | 59 (63.4)              |         |

In Table 4, losses to follow-up (n=38 at three months, n=43 at 6 months and n=87 at 12 months) are categorized in the same group as participants not reporting regular use of the fitness club.

Also after adjusting for confounders (age, cohabitation, total household income, BMI, children and gender, regular use of the fitness club  $\geq$  two times weekly was associated with reporting high SPH (OR 3.532 [95% CI 1.60 to 7.82], p=0.002) and QoL (OR 1.914 [95% CI 0.95 to 3.86], p=0.069) (Table 5).

**Table 5:** The association between use of a fitness club and High SPH / QoL at 12 months, controlled for age, cohabitation, total household income, BMI, children, and gender.

| Outcomes                                             | High SPH (n=128 (68.4%)) |                 |                           |         | High QoL (n=76 (40.6)) |                 |                           |         |
|------------------------------------------------------|--------------------------|-----------------|---------------------------|---------|------------------------|-----------------|---------------------------|---------|
|                                                      | %                        | Odds Ratio (OR) | 95%CI for OR, lower-upper | p-value | %                      | Odds Ratio (OR) | 95%CI for OR, lower-upper | p-value |
| Regular use (frequency $\geq$ two times weekly)      | 59 (50.9%)               | 3.532           | 1.595-7.821               | 0.002   | 34 (44.7%)             | 1.914           | 0.950-3.856               | 0.069   |
| Age (> 40 years)                                     | 44 (34.4%)               | 1.150           | 0.506-2.613               | 0.738   | 23 (30.3%)             | 1.388           | 0.636-3.032               | 0.410   |
| Living with a partner (yes)                          | 83 (64.8%)               | 0.644           | 0.274-1.509               | 0.311   | 57 (75%)               | 0.369           | 0.161-0.849               | 0.019   |
| High household income ( $\geq$ 87 500\$ per year)    | 59 (48.8%)               | 0.972           | 0.405-2.332               | 0.950   | 39 (51.3%)             | 1.214           | 0.540-2.726               | 0.639   |
| Body Mass Index (BMI) ( $\geq$ 25kg/m <sup>2</sup> ) | 66 (51.6%)               | 1.120           | 0.524-2.392               | 0.770   | 31 (40.8%)             | 1.985           | 0.983-4.010               | 0.056   |
| Children (yes)                                       | 37 (28.9%)               | 0.833           | 0.353-1.964               | 0.676   | 24 (31.6%)             | 1.072           | 0.480-2.395               | 0.866   |
| Gender (man)                                         | 70 (54.7%)               | 0.733           | 0.348-1.546               | 0.415   | 36 (47.4%)             | 1.387           | 0.688-2.796               | 0.360   |

1  
2  
3 To evaluate if the participants were representative of our initial study population, a  
4  
5 comparison analysis was performed with the 63 participants lost to follow-up at 12 months.  
6  
7  
8 No differences were found concerning SPH and QoL, nor demographic and socioeconomic  
9  
10 variables (data not shown).  
11  
12  
13  
14  
15  
16  
17  
18  
19  
20  
21  
22  
23  
24  
25  
26  
27  
28  
29  
30  
31  
32  
33  
34  
35  
36  
37  
38  
39  
40  
41  
42  
43  
44  
45  
46  
47  
48  
49  
50  
51  
52  
53  
54  
55  
56  
57  
58  
59  
60

For peer review only

## DISCUSSION

To our knowledge, this is the first study that has investigated SPH and QoL among new beginner exercisers in a fitness club setting. The main findings were an increase in mean scores for all five statements in QoL, even if only two of the statements reached statistical significance. We also found an improvement in QoL sum score throughout the one-year follow-up period. No changes were observed for SPH during the initial year of fitness club membership. Regularly fitness club users rated SPH higher at all measurement points, as well as perceived their QoL higher than non-regular users at 12 months follow-up.

We found no changes in SPH throughout the follow-up period, which is contrary to another study investigating SPH among healthy adults (3). One explanation to this may be that more than half of the participants (66.7%) in our study rated their SPH as high already at onset of fitness club membership, which caused less opportunity for further improvement. Also, very few (4%) rated their SPH fair or poor at onset. As such, the ceiling effect in SPH might be a cause for our results. Previous research on the association between exercise and SPH have primarily been done among sick or elderly populations, reporting that regular physical activity and even a small dose of regular exercise (defined as engaging in activities more than once a week, in line with our definition of regular use of the gym) may improve SPH (43,44).

Precise definitions of QoL are scant and measures vary greatly (45). Still, research including systematic reviews and meta-analysis has suggested that regular exercise may enhance QoL and contribute to emotional wellbeing (16,17,45). This is consistent with the present study, where regular exercise at the fitness club was associated with higher scores in perceived QoL. Our data also give some support for a dose-response curve and a threshold of at least twice weekly to achieve benefits in SPH and QoL. However, we cannot conclude that exercise

1  
2  
3 contributes to QoL, or if it is the other way around. We found, however, that QoL score  
4 increased from onset of membership to 12 months follow-up, lending credibility to the  
5 hypothesis that improvement in QoL might be a key motivator for sustained exercise (46).  
6  
7 However, social and cognitive factors (such as social interactions while exercising, group  
8 cohesion and self-efficacy) may confound the association between regular use of a fitness  
9 club and QoL. In line with others, we believe that these factors might have a mediating role,  
10 rather than being real confounding factors (46,47). Throughout the follow-up period, there  
11 was an increase in two out of five statements of QoL and an improvement in the total sum  
12 score. The three non-significant statements could be explained by a higher rating already at  
13 onset, and a possible ceiling effect, which we also discussed earlier regarding SPH. Besides,  
14 the SWLS focuses to a large extent on how the participants feel and think with respect to  
15 several important aspects from a life-long perspective (from birth and up to date). Hence, it  
16 can be difficult to rationalize our results and the influence of joining a fitness club, whatever  
17 the findings.  
18  
19  
20  
21  
22  
23  
24  
25  
26  
27  
28  
29  
30  
31  
32  
33  
34  
35  
36  
37

### 38 **Participants**

39 More than half of the participants did not manage to visit the fitness club regularly throughout  
40 the initial year of membership. Others have also reported a drop-out rate from regular use of  
41 the fitness club around 50% within the first 6-12 months of membership (48,49). A  
42 retrospective study found that only 10% of fitness club members reported regular gym  
43 attendance (at least four visits monthly) after six months (50). In our study, this number was  
44 higher. Nevertheless, this shows that maintaining an active lifestyle can be challenging even  
45 for motivated individuals, and it highlights the need to develop strategies and interventions to  
46 facilitate exercise behavior in a fitness club setting. It may be useful to understand that regular  
47 exercise can contribute to increased SPH and QoL. Finding time is vital if regular use is to be  
48  
49  
50  
51  
52  
53  
54  
55  
56  
57  
58  
59  
60

1  
2  
3 adhered to. Even though most fitness clubs are located where people live and travel, have  
4 flexible opening hours, many also offering childcare, former physically inactive individuals  
5 may have had problems getting into a weekly routine (51).  
6  
7  
8  
9  
10

## 11 **Outcomes**

12 Both SPH and QoL were measured by a standardized electronic questionnaire at all time-  
13 points. The use of an electronic questionnaire based on previously validated surveys made it  
14 easy to gather responses quickly and eliminate the costs associated with printing and  
15 distributing paper-based questionnaires. Self-report is inexpensive, takes up little time to  
16 conduct and is practical. Anyway, due to social desirability, the risk of over-reporting may be  
17 high. For instance, individuals may report more socially acceptable answers rather than being  
18 honest and may interpret the wording of questions differently (52). However, assessment of  
19 SPH and QoL depends on the individual, subjective perception. Hence, self-report may be an  
20 appropriate measurement method for measuring SPH and QoL.  
21  
22  
23  
24  
25  
26  
27  
28  
29  
30  
31  
32  
33  
34  
35  
36  
37

38 SPH was assessed by answering a global single question used in numerous other studies and  
39 subjective assessment of health has been found to highly correlate with results of its objective  
40 assessment and health status indices (53). QoL was measured by a Norwegian version of  
41 SWLS which is considered to be a reliable and valid instrument and has been widely used to  
42 examine the subjective QoL of people experiencing different health concerns (28,38).  
43  
44  
45  
46  
47  
48  
49  
50

## 51 **Strengths and limitations**

52 A strength of the present study was the use of prospective study design with 12 months  
53 follow-up. Also, the inclusion of data concerning personal health behaviors (BMI and  
54 exercise) and demographics (age, cohabitation, total household income, having children) is  
55  
56  
57  
58  
59  
60

1  
2  
3 considered strengths. Hence, we were able to adjust for these factors in the analyses. All  
4 participants were untrained at study enrollment and may as such be considered representative  
5 for new members at fitness clubs (25), as well as comparable to the general adult population  
6 (54). There was an equal number of men and women and we used valid and reliable  
7 measurement methods (28,30). Despite a high dropout from the study itself, we had a  
8 sufficient number of participants at all measurement points regarding a priori power  
9 calculation for SPH and QoL.  
10  
11  
12  
13  
14  
15  
16  
17  
18  
19  
20

21 Limitations were that the investigation was carried out in Norwegian only, excluding  
22 participants from other ethnic groups, as well as that attendance at the fitness club was self-  
23 reported. Studies are consistent in showing that individuals tend to overestimate what they do  
24 (55,56). Nevertheless, if this was the case, the results of the present study provide a  
25 conservative calculation of exercise involvement at the fitness club. The questionnaire took  
26 approximately 30 minutes to complete and was answered electronically. Such a time-  
27 consuming questionnaire might cause more losses to follow-up. Further, participation was  
28 voluntary, and it may be possible that the data contain a certain level of volunteer-bias,  
29 questioning the representativeness of the results.  
30  
31  
32  
33  
34  
35  
36  
37  
38  
39  
40  
41  
42  
43  
44

## 45 **Conclusion**

46 We found an increase in all five statements in QoL, while only two of the items reached  
47 statistical significance. We also found an improvement in the QoL sum score, whereas no  
48 changes were observed in SPH during the first year of fitness club membership. Our results  
49 add to the literature that regular attendance at the fitness club after 12 months was associated  
50 with a high SPH and QoL.  
51  
52  
53  
54  
55  
56  
57  
58  
59  
60



### Acknowledgments

The authors thank Ingar Holme and Morten Fagerland, professors in biostatistics, Norwegian School of Sports Sciences, for guidance with power considerations and statistical analysis.

For peer review only

## Footnotes

· **Contributors** HH outlined the manuscript. CG plotted all data and developed the questionnaire together with LAHH. CG and LAHH were responsible for data collection and recruited the participants. HH, CG and LAHH did the testing. LAHH originated the idea for the present study and supervised the project. All authors participated in discussing the design of the study, read and corrected draft versions of the manuscript and approved the final manuscript.

· **Competing interests** None declared.

· **Funding** The project was financed by and conducted at the Norwegian School of Sports Sciences.

· **Ethics approval** The project was reviewed by the Regional Committee for Medical and Health Research Ethics (REK 2015/1443 A), who concluded that, according to the Act on medical and health research (the Health Research Act 2008), the study did not require full review by REK. The project was approved by the Norwegian Social Science Data Service (NSD 44135).

· **Data sharing statement** All data are fully available without restriction. Data are from the 'Physical activity at fitness clubs. -A venue for public health'-a study whose authors may be contacted at the Norwegian School of Sports Sciences. [Hege.heiestad@nih.no](mailto:Hege.heiestad@nih.no).

· **Patient consent for publication** Not required.

## References:

1. World Health Organization. (2014). *Basic documents*. World Health Organization.
2. Falconer, J., & Quesnel-Vallée, A. (2017). Pathway from poor self-rated health to mortality: Explanatory power of disease diagnosis. *Social Science & Medicine*, *190*, 227-236.
3. Bamia, C., Orfanos, P., Juerges, H., Schöttker, B., Brenner, H., Lorbeer, R., ... & Lagiou, P. (2017). Self-rated health and all-cause and cause-specific mortality of older adults: Individual data meta-analysis of prospective cohort studies in the CHANCES Consortium. *Maturitas*, *103*, 37-44.
4. Barger, S. D., Cribbet, M. R., & Muldoon, M. F. (2016). Participant-reported health status predicts cardiovascular and all-cause mortality independent of established and nontraditional biomarkers: evidence from a representative US sample. *Journal of the American Heart Association*, *5*(9), e003741.
5. Bopp, M., Braun, J., Gutzwiller, F., Faeh, D., & Swiss National Cohort Study Group. (2012). Health risk or resource? Gradual and independent association between self-rated health and mortality persists over 30 years. *PloS one*, *7*(2), e30795.
6. Vingård, E., Alexanderson, K., & Norlund, A. (2004). Chapter 9. Consequences of being on sick leave. *Scandinavian journal of public health*, *32*(63\_suppl), 207-215
7. Miilunpalo, S., Vuori, I., Oja, P., Pasanen, M., & Urponen, H. (1997). Self-rated health status as a health measure: the predictive value of self-reported health status on the use of physician services and on mortality in the working-age population. *Journal of clinical epidemiology*, *50*(5), 517-528.
8. Chodzko-Zajko WJ, Proctor DN, Fiatarone Singh MA, Minson CT, Nigg CR, Salem GJ, et al. (2009). Exercise and physical activity for older adults. *Med Sci Sports Exerc* 2009;41(7):1510-1530.
9. World Health Organization. (1996). Health interview surveys: Towards international harmonization of methods and instruments (Vol. 58). Copenhagen, Denmark: World Health Organization Regional Office for Europe.
10. Lee, Y. (2000). The predictive value of self-assessed general, physical, and mental health on functional decline and mortality in older adults. *Journal of Epidemiology & Community Health*, *54*(2), 123-129.
11. Lera-Lopez, F., Ollo-López, A., Garrués-Irisarri, M. et al. *Eur J Ageing* (2019) 16:3. <https://doi.org/10.1007/s10433-018-0471-6>
12. Garber, C.E., et al. (2011). *American College of Sports Medicine position stand. Quantity and quality of exercise for developing and maintaining cardiorespiratory, musculoskeletal, and neuromotor fitness in apparently healthy adults: guidance for prescribing exercise*. *Med Sci Sports Exerc*, 2011. **43**(7): p. 1334-59.
13. Weinberg, R. S., & Gould, D. (2018). *Foundations of Sport and Exercise Psychology*, 7E. Human Kinetics. Ch18, p423-433
14. D. L., Hammond, C. C., Reifsteck, E. J., Jehu, C. M., Williams, R. A., Adams, M. M., ... & Shang, Y. T. (2013). Physical activity and quality of life. *Journal of Preventive Medicine and Public Health*, *46*(Suppl 1), S28.
15. Awick, E. A., Ehlers, D. K., Aguiñaga, S., Daugherty, A. M., Kramer, A. F., & McAuley, E. (2017). Effects of a randomized exercise trial on physical activity, psychological distress and quality of life in older adults. *General hospital psychiatry*, *49*, 44-50.
16. Gillison FB, Skevington SM, Sato A, Standage M, Evangelidou S. (2009). The effects of exercise interventions on quality of life in clinical and healthy populations: a meta-analysis. *Soc Sci Med* 2009; 68(9):1700-1710.
17. Bize R, Johnson JA, Plotnikoff RC. (2007). Physical activity level and health-related quality of life in the general adult population: a systematic review. *Prev Med* 2007;45(6):401-415.
18. Gill, D. L., Hammond, C. C., Reifsteck, E. J., Jehu, C. M., Williams, R. A., Adams, M. M., ... & Shang, Y. T. (2013). Physical activity and quality of life. *Journal of Preventive Medicine and Public Health*, *46*(Suppl 1), S28.
19. Cherry, K. (2018). Cross-sectional research method: How does it work. *Advantages and challenges. Student Resources*. Available online from <https://www.verywellmind.com/cross-sectional-research-how-does-it-work>.
20. The International Health, R.S.A., *The IHRS Global Report 2019*. (2019).
21. Sperandei, S., M.C. Vieira, and A.C. Reis. (2016). *Adherence to physical activity in an unsupervised setting: Explanatory variables for high attrition rates among fitness center members*. *Journal of Science and Medicine in Sport*, 2016. *19*(11): p. 916-920.
22. Gjestvang, C., Stensrud, T., & Haakstad, L. A. (2019). Are changes in physical fitness, body composition and weight associated with exercise attendance and dropout among fitness club members? A longitudinal prospective study. *BMJ Open*, *9*(4), e027987.

23. Gjestvang, C., Stensrud, T., & Haakstad, L. A. (2017). How is the rating of perceived capacity related to VO<sub>2</sub>max and what is VO<sub>2</sub>max at onset of training?. *BMJ open sport & exercise medicine*, 3(1), e000232.
24. Gjestvang, C., Stensrud, T., Hansen, B. H., Kolle, E., & Haakstad, L. A. H. (2019). Are Fitness Club Members More Likely To Meet Physical Activity Guidelines Than The General Adult Population?: 3035: Board# 81 May 31 3: 30 PM-5: 00 PM. *Medicine & Science in Sports & Exercise*, 51(6), 835
25. Haakstad, L. A., Gjestvang, C., Lamerton, T., & Bø, K. (2020). Urinary incontinence in a fitness club setting—is it a workout problem?. *International Urogynecology Journal*, 1-8 (25).
26. Hawley-Hague, H.H., M; Skelton, D.A; Todd, C., *Review of how we should define (and measure) adherence in studies examining older adults' participation in exercise classes*. *BMJ Open Sport Exerc Med*, 2016. 6: p. 6.
27. Doblhammer, G., & Gumà, J. (Eds.). (2018). *A Demographic Perspective on Gender, Family and Health in Europe*. Springer International Publishing.
28. Pavot, W., & Diener, E. (2009). Review of the satisfaction with life scale. In *Assessing well-being* (pp. 101-117). Springer, Dordrecht.
29. Springer, Dordrecht, and Corrigan, J. D., Kolakowsky-Hayner, S., Wright, J., Bellon, K., & Carufel, P. (2013). The satisfaction with life scale. *The Journal of head trauma rehabilitation*, 28(6), 489-491.
30. Machón, M., Vergara, I., Dorronsoro, M., Vrotsou, K., & Larrañaga, I. (2016). Self-perceived health in functionally independent older people: associated factors. *BMC geriatrics*, 16(1), 66.
31. Girón, P. (2012). Is age associated with self-rated health among older people in Spain? *Central European Journal of public health*, 20(3), 185.
32. Diener, E., Emmons, R. A., Larsen, R. J., & Griffin, S. (1985). The Satisfaction With Life Scale. *Journal of personality assessment*, 49(1), 71-75. DOI: 10.1207/s15327752jpa4901\_13
33. Pavot, William, & Diener, Ed. (2008). The satisfaction with life scale and the emerging construct of life satisfaction. *The Journal of Positive Psychology*, 3(2), 137-152.
34. Tessier, P., Blanchin, M., & Sébille, V. (2017). Does the relationship between health-related quality of life and subjective well-being change over time? An exploratory study among breast cancer patients. *Social Science & Medicine*, 174, 96-103.
35. Pavot, W., Diener, E. D., Colvin, C. R., & Sandvik, E. (1991). Further validation of the Satisfaction with Life Scale: Evidence for the cross-method convergence of well-being measures. *Journal of personality assessment*, 57(1), 149-161.
36. Jovanović, V., Lazić, M., & Gavrilov-Jerković, V. (2020). Measuring life satisfaction among psychiatric patients: Measurement invariance and validity of the Satisfaction with Life Scale. *Clinical Psychology & Psychotherapy*.
37. Kobau, R., Sniezek, J., Zack, M. M., Lucas, R. E., & Burns, A. (2010). Well-being assessment: An evaluation of well-being scales for public health and population estimates of well-being among US adults. *Applied Psychology: Health and Well-Being*, 2(3), 272-297.
38. Clench-Aas, J., Nes, R. B., Dalgard, O. S., & Aarø, L. E. (2011). Dimensionality and measurement invariance in the Satisfaction with Life Scale in Norway. *Quality of Life Research*, 20(8), 1307-1317.
39. Vittersø, J. (2009). Satisfaction with life scale. *Tidsskrift for norsk psykologforening*, 46, 757-758.
40. Ogbeide, S. A., Neumann, C. A., Sandoval, B. E., & Rudebock, C. D. (2010). Gender differences between body weight and psychological well-Being during young adulthood: A brief report. *The New School Psychology Bulletin*, 8(1), 41-46
41. Pino-Domínguez, L., Navarro-Gil, P., González-Vélez, A. E., Prieto-Flores, M. E., Ayala, A., Rojo-Pérez, F., ... & Forjaz, M. J. (2016). Self-perceived health status, gender, and work status. *Journal of women & aging*, 28(5), 386-394
42. [https://ec.europa.eu/eurostat/statistics-explained/index.php/Self-perceived\\_health\\_statistics](https://ec.europa.eu/eurostat/statistics-explained/index.php/Self-perceived_health_statistics)
43. Bherer, L., Erickson, K. I., & Liu-Ambrose, T. (2013). A review of the effects of physical activity and exercise on cognitive and brain functions in older adults. *Journal of aging research*, 2013.
44. Chapman, S. B., Aslan, S., Spence, J. S., DeFina, L. F., Keebler, M. W., Didehbani, N., & Lu, H. (2013). Shorter-term aerobic exercise improves brain, cognition, and cardiovascular fitness in aging. *Frontiers in aging neuroscience*, 5, 75.
45. Gillison, F. B., Skevington, S. M., Sato, A., Standage, M., & Evangelidou, S. (2009). The effects of exercise interventions on quality of life in clinical and healthy populations; a meta-analysis. *Social science & medicine*, 68(9), 1700-1710.
46. Segar, M. L., Eccles, J. S., & Richardson, C. R. (2011). Rebranding exercise: closing the gap between values and behavior. *International journal of behavioral nutrition and physical activity*, 8(1), 94.
47. Young, M. D., Plotnikoff, R. C., Collins, C. E., Callister, R., & Morgan, P. J. (2014). Social cognitive theory and physical activity: a systematic review and meta-analysis. *Obesity Reviews*, 15(12), 983-995.

- 1  
2  
3 48. Rustaden, A.M., et al., *Effects of BodyPump and resistance training with and without a personal trainer on muscle strength and body composition in overweight and obese women-A randomized controlled trial*. *Obes Res Clin Pract*, 2017. **11**(6): p. 728-739
- 4  
5  
6 49. Middelkamp, J., et al., *The Effects of a Self-Efficacy Intervention on Exercise Behavior of Fitness Club Members in 52 Weeks and Long-Term Relationships of Transtheoretical Model Constructs*. *J Sports Sci Med*, 2017. **16**(2): p. 163-171.
- 7  
8  
9 50. Middelkamp, J., Van Rooijen, M., & Steenbergen, B. (2016). Attendance behavior of ex-members in fitness clubs: A retrospective study applying the stages of change. *Perceptual and Motor Skills*, *122*(1), 350-359.
- 10  
11  
12 51. Masse, L.C., et al., *Understanding the mechanism of physical activity behavior change: Challenges and a call for action Introduction*. *Psychology of Sport and Exercise*, 2011. **12**(1): p. 1-6.
- 13  
14 52. Kaleta, D., Makowiec-Dąbrowska, T., Dziańska-Zaborszczyk, E., & Jegier, A. (2006). Physical activity and self-perceived health status. *International journal of occupational medicine and environmental health*, *19*(1), 61-69.
- 15  
16  
17 53. Caputo, A. (2017). Social desirability bias in self-reported well-being measures: Evidence from an online survey. *Universitas Psychologica*, *16*(2), 245-255.
- 18  
19 54. Dumith, S. C., Hallal, P. C., Reis, R. S., & Kohl III, H. W. (2011). Worldwide prevalence of physical inactivity and its association with human development index in 76 countries. *Preventive medicine*, *53*(1-2), 24-28.
- 20  
21  
22 55. Sallis, J. F., & Saelens, B. E. (2000). Assessment of physical activity by self-report: status, limitations, and future directions. *Research quarterly for exercise and sport*, *71*(sup2), 1-14.
- 23  
24 56. Schaller, A., Rudolf, K., Dejonghe, L., Grieben, C., & Froboese, I. (2016). Influencing factors on the overestimation of self-reported physical activity: a cross-sectional analysis of low back pain patients and healthy controls. *BioMed research international*, 2016.
- 25  
26  
27  
28  
29  
30  
31  
32  
33  
34  
35  
36  
37  
38  
39  
40  
41  
42  
43  
44  
45  
46  
47  
48  
49  
50  
51  
52  
53  
54  
55  
56  
57  
58  
59  
60

1  
2  
3 **Figure 1.** The flow chart of the participants throughout the data-collection.  
4  
5  
6  
7  
8  
9  
10  
11  
12  
13  
14  
15  
16  
17  
18  
19  
20  
21  
22  
23  
24  
25  
26  
27  
28  
29  
30  
31  
32  
33  
34  
35  
36  
37  
38  
39  
40  
41  
42  
43  
44  
45  
46  
47  
48  
49  
50  
51  
52  
53  
54  
55  
56  
57  
58  
59  
60

For peer review only

1  
2  
3  
4  
5  
6  
7  
8  
9  
10  
11  
12  
13  
14  
15  
16  
17  
18  
19  
20  
21  
22  
23  
24  
25  
26  
27  
28  
29  
30  
31  
32  
33  
34  
35  
36  
37  
38  
39  
40  
41  
42  
43  
44  
45  
46  
47  
48  
49  
50

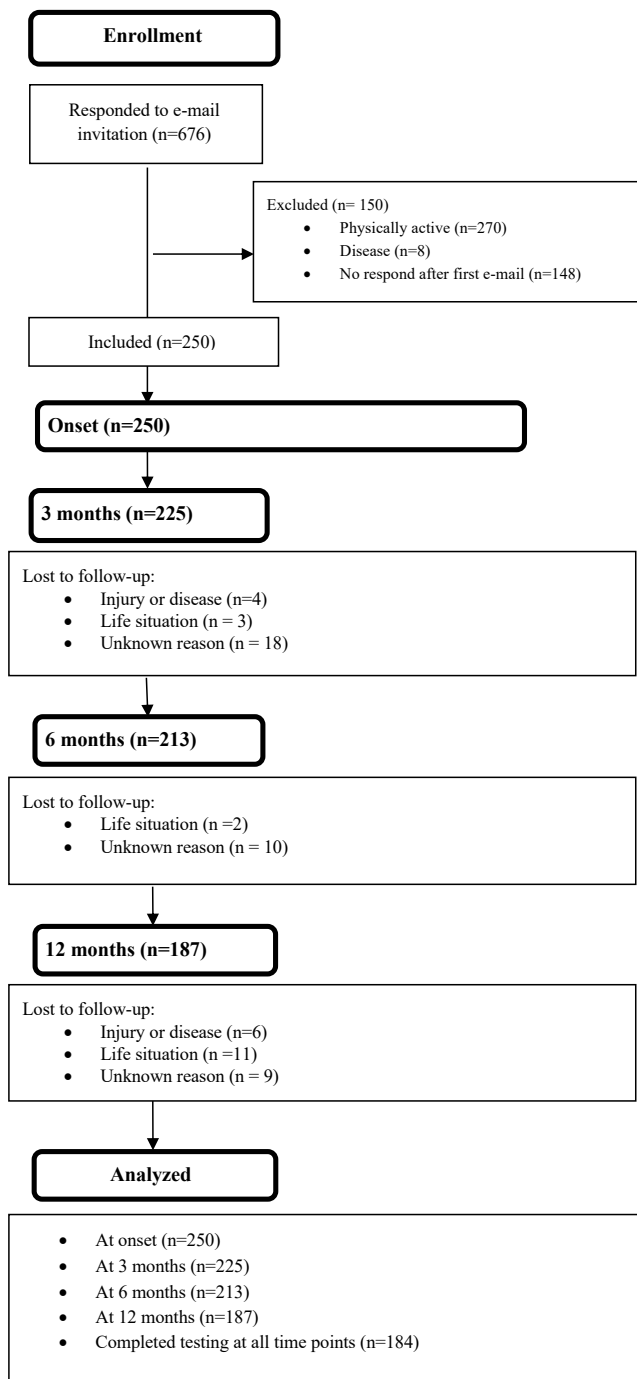

**Figure 1:** Flow diagram of the participants throughout the study.



STROBE Statement—Checklist of items that should be included in reports of *cross-sectional studies*

|                              | Item No | Recommendation                                                                                                                                                                                    | Page No        |
|------------------------------|---------|---------------------------------------------------------------------------------------------------------------------------------------------------------------------------------------------------|----------------|
| <b>Title and abstract</b>    | 1       | (a) Indicate the study's design with a commonly used term in the title or the abstract                                                                                                            | 4              |
|                              |         | (b) Provide in the abstract an informative and balanced summary of what was done and what was found                                                                                               | 2-3            |
| <b>Introduction</b>          |         |                                                                                                                                                                                                   |                |
| Background/rationale         | 2       | Explain the scientific background and rationale for the investigation being reported                                                                                                              | 4-5            |
| Objectives                   | 3       | State specific objectives, including any prespecified hypotheses                                                                                                                                  | 5              |
| <b>Methods</b>               |         |                                                                                                                                                                                                   |                |
| Study design                 | 4       | Present key elements of study design early in the paper                                                                                                                                           | 3              |
| Setting                      | 5       | Describe the setting, locations, and relevant dates, including periods of recruitment, exposure, follow-up, and data collection                                                                   | 6              |
| Participants                 | 6       | (a) Give the eligibility criteria, and the sources and methods of selection of participants                                                                                                       | 6              |
| Variables                    | 7       | Clearly define all outcomes, exposures, predictors, potential confounders, and effect modifiers. Give diagnostic criteria, if applicable                                                          | 7-8            |
| Data sources/<br>measurement | 8*      | For each variable of interest, give sources of data and details of methods of assessment (measurement). Describe comparability of assessment methods if there is more than one group              | 6-8            |
| Bias                         | 9       | Describe any efforts to address potential sources of bias                                                                                                                                         |                |
| Study size                   | 10      | Explain how the study size was arrived at                                                                                                                                                         | 6-7            |
| Quantitative variables       | 11      | Explain how quantitative variables were handled in the analyses. If applicable, describe which groupings were chosen and why                                                                      | 7-8            |
| Statistical methods          | 12      | (a) Describe all statistical methods, including those used to control for confounding                                                                                                             | 9              |
|                              |         | (b) Describe any methods used to examine subgroups and interactions                                                                                                                               | 9              |
|                              |         | (c) Explain how missing data were addressed                                                                                                                                                       | 9              |
|                              |         | (d) If applicable, describe analytical methods taking account of sampling strategy                                                                                                                |                |
|                              |         | (e) Describe any sensitivity analyses                                                                                                                                                             |                |
| <b>Results</b>               |         |                                                                                                                                                                                                   |                |
| Participants                 | 13*     | (a) Report numbers of individuals at each stage of study—eg numbers potentially eligible, examined for eligibility, confirmed eligible, included in the study, completing follow-up, and analysed | 9 and Figure 1 |
|                              |         | (b) Give reasons for non-participation at each stage                                                                                                                                              | Figure 1       |
|                              |         | (c) Consider use of a flow diagram                                                                                                                                                                | Figure 1       |
| Descriptive data             | 14*     | (a) Give characteristics of study participants (eg demographic, clinical, social) and information on exposures and potential confounders                                                          | 10             |
|                              |         | (b) Indicate number of participants with missing data for each variable of interest                                                                                                               | Table 2-3      |
| Outcome data                 | 15*     | Report numbers of outcome events or summary measures                                                                                                                                              | 10-11          |
| Main results                 | 16      | (a) Give unadjusted estimates and, if applicable, confounder-adjusted estimates and their precision (eg, 95% confidence interval). Make                                                           | 10-13          |



|                          |    |                                                                                                                                                                            |       |
|--------------------------|----|----------------------------------------------------------------------------------------------------------------------------------------------------------------------------|-------|
|                          |    | clear which confounders were adjusted for and why they were included                                                                                                       |       |
|                          |    | (b) Report category boundaries when continuous variables were categorized                                                                                                  |       |
|                          |    | (c) If relevant, consider translating estimates of relative risk into absolute risk for a meaningful time period                                                           |       |
| Other analyses           | 17 | Report other analyses done—eg analyses of subgroups and interactions, and sensitivity analyses                                                                             | 10-13 |
| <b>Discussion</b>        |    |                                                                                                                                                                            |       |
| Key results              | 18 | Summarise key results with reference to study objectives                                                                                                                   | 14    |
| Limitations              | 19 | Discuss limitations of the study, taking into account sources of potential bias or imprecision. Discuss both direction and magnitude of any potential bias                 | 17    |
| Interpretation           | 20 | Give a cautious overall interpretation of results considering objectives, limitations, multiplicity of analyses, results from similar studies, and other relevant evidence | 14-17 |
| Generalisability         | 21 | Discuss the generalisability (external validity) of the study results                                                                                                      | 16    |
| <b>Other information</b> |    |                                                                                                                                                                            |       |
| Funding                  | 22 | Give the source of funding and the role of the funders for the present study and, if applicable, for the original study on which the present article is based              | 6     |

\*Give information separately for exposed and unexposed groups.

**Note:** An Explanation and Elaboration article discusses each checklist item and gives methodological background and published examples of transparent reporting. The STROBE checklist is best used in conjunction with this article (freely available on the Web sites of PLoS Medicine at <http://www.plosmedicine.org/>, Annals of Internal Medicine at <http://www.annals.org/>, and Epidemiology at <http://www.epidem.com/>). Information on the STROBE Initiative is available at [www.strobe-statement.org](http://www.strobe-statement.org).

# BMJ Open

## Investigating Self-Perceived Health and Quality of Life; -a longitudinal prospective study among beginner recreational exercisers in a fitness club setting

|                                 |                                                                                                                                                                                                                      |
|---------------------------------|----------------------------------------------------------------------------------------------------------------------------------------------------------------------------------------------------------------------|
| Journal:                        | <i>BMJ Open</i>                                                                                                                                                                                                      |
| Manuscript ID                   | bmjopen-2019-036250.R2                                                                                                                                                                                               |
| Article Type:                   | Original research                                                                                                                                                                                                    |
| Date Submitted by the Author:   | 24-Apr-2020                                                                                                                                                                                                          |
| Complete List of Authors:       | Heiestad, Hege; Norwegian School of Sports Science<br>Gjestvang, Christina; Norwegian School of Sports Sciences, Department of Sports Medicine<br>Haakstad, Lene; Norwegian School of Sport Sciences, Sport Medicine |
| <b>Primary Subject Heading</b>: | Sports and exercise medicine                                                                                                                                                                                         |
| Secondary Subject Heading:      | Public health                                                                                                                                                                                                        |
| Keywords:                       | SPORTS MEDICINE, PUBLIC HEALTH, MENTAL HEALTH                                                                                                                                                                        |
|                                 |                                                                                                                                                                                                                      |

SCHOLARONE™  
Manuscripts



I, the Submitting Author has the right to grant and does grant on behalf of all authors of the Work (as defined in the below author licence), an exclusive licence and/or a non-exclusive licence for contributions from authors who are: i) UK Crown employees; ii) where BMJ has agreed a CC-BY licence shall apply, and/or iii) in accordance with the terms applicable for US Federal Government officers or employees acting as part of their official duties; on a worldwide, perpetual, irrevocable, royalty-free basis to BMJ Publishing Group Ltd ("BMJ") its licensees and where the relevant Journal is co-owned by BMJ to the co-owners of the Journal, to publish the Work in this journal and any other BMJ products and to exploit all rights, as set out in our [licence](#).

The Submitting Author accepts and understands that any supply made under these terms is made by BMJ to the Submitting Author unless you are acting as an employee on behalf of your employer or a postgraduate student of an affiliated institution which is paying any applicable article publishing charge ("APC") for Open Access articles. Where the Submitting Author wishes to make the Work available on an Open Access basis (and intends to pay the relevant APC), the terms of reuse of such Open Access shall be governed by a Creative Commons licence – details of these licences and which [Creative Commons](#) licence will apply to this Work are set out in our licence referred to above.

Other than as permitted in any relevant BMJ Author's Self Archiving Policies, I confirm this Work has not been accepted for publication elsewhere, is not being considered for publication elsewhere and does not duplicate material already published. I confirm all authors consent to publication of this Work and authorise the granting of this licence.

1  
2  
3 **Investigating Self-Perceived Health and Quality of Life; -a longitudinal prospective**  
4  
5 **study among beginner recreational exercisers in a fitness club setting**  
6  
7  
8  
9  
10

11 Hege Heiestad, Physical therapist, exercise scientist, MSc

12 Norwegian School of Sports Sciences, Department of Sports Medicine, Oslo, Norway

13 (E-mail: [hege.heiestad@nih.no](mailto:hege.heiestad@nih.no))  
14  
15  
16  
17  
18  
19  
20

21 Christina Gjestvang, Ph.D. student, exercise scientist, MSc

22 Norwegian School of Sports Sciences, Department of Sports Medicine, Oslo, Norway

23 (E-mail: [christina.gjestvang@nih.no](mailto:christina.gjestvang@nih.no))  
24  
25  
26  
27  
28  
29  
30

31 Lene A. H. Haakstad, Associate professor, exercise scientist, MSc, PhD

32 Norwegian School of Sports Sciences, Department of Sports Medicine, Oslo, Norway

33 (E-mail: [lahaakstad@nih.no](mailto:lahaakstad@nih.no))  
34  
35  
36  
37  
38  
39  
40  
41  
42

43 **Correspondent author**

44 Hege Heiestad

45 Norwegian School of Sport Sciences

46 Department of Sports Medicine

47 P.O Box 4014, Ullevål Stadion

48 0806 Oslo, Norway

49 Tlf. +47 92 23 93 04

50 E-mail: [hege.heiestad@nih.no](mailto:hege.heiestad@nih.no)  
51  
52  
53  
54  
55  
56  
57  
58  
59  
60

## ABSTRACT

**Objectives:** This study investigated SPH and QoL at onset and after three, six and 12 months of fitness club membership. Also, we compared SPH and QoL between those who reported regular use of the fitness club ( $\geq$  two exercise sessions/week the last month) with those who did not (one exercise session/week, or no exercise the last month).

**Design:** Longitudinal prospective study.

**Setting:** 25 fitness clubs in Oslo, Norway.

**Participants:** In total, 250 newly registered fitness club members (equal numbers of men and women, mean age= $36.4 \pm 11.3$  years, mean BMI= $25.7 \pm 4.4$ ) were recruited. At onset (n=250), after three (n=224), six (n=213) and 12 months (n=187), the participants answered an electronic questionnaire, covering background variables, exercise involvement, perceived SPH and QoL.

**Outcome measures:** SPH was measured by a single item question, rating health status from poor to excellent on a five-point scale. High SPH was dichotomized as excellent or good, and low SPH as moderate, fair or poor. QoL was measured on a 7-item scale, rating five statements and dichotomized according to a total max sum score of 35, with low QoL  $\leq 25$  and high QoL  $> 25$ .

**Results:** Repeated measurements did not show any changes in SPH. In QoL, we observed an improvement in QoL sum score and a significant increase in mean scores for two out of five statements at 12 months follow-up: “*In most ways, my life is close to my ideal*” (p=0.036) and “*If I could live my life over, I would change almost nothing*” (p<0.001). Regular use of the fitness club was associated with high SPH (OR 3.532 [95% CI 1.60 to 7.82], p=0.002) and high QoL (OR 1.914 [95% CI 0.95 to 3.86], p=0.069). The results were unchanged after adjusting for confounders.

**Conclusions:** Regular attendance at a fitness club was associated with high SPH and high

1  
2  
3 QoL at 12 months follow-up.  
4  
5  
6

7  
8 **STRENGTHS AND LIMITATIONS OF THIS STUDY**  
9

- 10
- 11 • The use of prospective study design with 12 months follow-up.
  - 12 • Valid and reliable measurement methods.
  - 13
  - 14 • The use of an electronic questionnaire based on previously validated surveys.
  - 15
  - 16
  - 17 • Self-reported attendance at the fitness club.
  - 18
  - 19
  - 20
  - 21
  - 22
  - 23
  - 24
  - 25
  - 26
  - 27
  - 28
  - 29
  - 30
  - 31
  - 32
  - 33
  - 34
  - 35
  - 36
  - 37
  - 38
  - 39
  - 40
  - 41
  - 42
  - 43
  - 44
  - 45
  - 46
  - 47
  - 48
  - 49
  - 50
  - 51
  - 52
  - 53
  - 54
  - 55
  - 56
  - 57
  - 58
  - 59
  - 60

## INTRODUCTION

Physical activity is a complex behavior influenced by several different determinants (1).

Much research has focused on the main factors that may lead to regular exercise or dropout.

There is consensus that enjoyment (intrinsic motives), social support, and access to exercise facilities (environmental factors) may positively influence exercise behavior. On the other side, lack of time and motivation (internal barriers) may inhibit exercise adherence (2).

According to the World Health Organization (3), health is not only the absence of somatic disease but also includes mental and social well-being, putting emphasis on the usefulness and need for investigating individuals' self-perception of overall health (SPH). Up to date, several studies have shown that low SPH may be a valid and robust predictor of morbidity and mortality of various diseases, such as cancer, cardiovascular disease, stress, diabetes and other chronic health conditions (4-7). Low SPH is as well associated with being sick-listed and frequent use of health care services (8,9). In different patient groups and among the elderly population, SPH has widely been used to evaluate the effect of health-care programs (10). The measure is a single-item question, including rating of health status from poor to excellent on a five-point scale, and as such popular for its simplicity and cost-effectiveness (11).

It is growing interest in the assessment of physical activity on modification of SPH, and studies have indicated a strong association between insufficient physical activity and lower SPH in adults, especially in older individuals (12,13). However, it is important to investigate SPH not only between individuals that are active or inactive according to current physical activity recommendations (14), but also if this differs between activity contexts (organized

1  
2  
3 sports clubs, public spaces and fitness clubs) and exercise involvement (frequency, duration,  
4 intensity, and modes) (15).  
5  
6  
7  
8  
9

10 Quality of life (QoL) has also become an important measurement because it is a meaningful  
11 indicator of both mental and physical well-being (16,17), and its positive association with  
12 physical activity has been consistently reported in the systematic reviews and meta-analyses  
13 18,19). Although there is limited data, it is suggested that QoL may be a key motivator for  
14 regular physical activity and exercise (20), meaning that individuals start and continue to be  
15 active because this contributes to their QoL. However, cross-sectional data precludes a  
16 conclusion regarding the nature of this association (21).  
17  
18  
19  
20  
21  
22  
23  
24  
25  
26  
27

28 Throughout the 1990s, a new venue for physical activity and exercise gradually grew in  
29 popularity, the fitness clubs. Worldwide, the fitness club industry has about 183 million  
30 members and counts more than 210 000 clubs (22). Those who join a fitness club may be  
31 initially motivated to exercise, still, previous studies have shown a high dropout-rate after  
32 only three months (23,24). This shows that maintaining regular exercise can be challenging  
33 even for motivated individuals. Even though this arena has become a large and growing venue  
34 for activity, the scientific knowledge of those that choose to be a member is scant. Research  
35 has not yet investigated how fitness club membership relates to SPH and QoL-status among  
36 beginner recreational exercisers. Hence, the primary aim of the present study was to report  
37 longitudinal data of SPH and QoL in an age-diverse group of men and women across the first  
38 year of fitness club membership. Secondary, we wanted to examine if SPH and QoL differed  
39 between those who reported regular use of the fitness club ( $\geq$  two exercise sessions/week the  
40 last month) with those who did not (one exercise session/week, or no exercise the last month).  
41  
42  
43  
44  
45  
46  
47  
48  
49  
50  
51  
52  
53  
54  
55  
56  
57  
58  
59  
60



## MATERIALS AND METHODS

### Study design and population

This is a secondary analysis of data collected as part of the research project “Fitness clubs - a venue for public health?” (24-27), a longitudinal prospective study, aiming to investigate which factors that influence exercise adherence in beginner recreational exercisers.

The project was reviewed by the Regional Committee for Medical and Health Research Ethics (REK 2015/1443 A), who concluded, according to the act on medical and health research (the Health Research Act 2008), the study did not require full review by REK. The procedures followed the World Medical Association Declaration of Helsinki and were approved by the Norwegian Social Science Data Service (NSD 44135), financed and conducted at the Norwegian School of Sport Sciences (NSSS) (October 2015 - November 2018). No economic compensation was given to the participants.

New members at 25 fitness clubs in Oslo, Norway were contacted by an e-mail invitation. At first contact, the aims and implications of the study were explained, and the eligibility criteria checked. Enrollment was limited to adults ( $\geq 18$  years), <four weeks membership, healthy (no disease considered to hinder physical activity, e.g., severe heart disease or hypertension), and physically inactive (exercising <60 min/week at a moderate or vigorous intensity or brisk walking <150 min/week, the last six months) (14,28).

Sample size considerations for SPH and QoL was done together with a professor in biostatistics at NSSS, based on findings in other studies (29-31). When an individual starts exercising, it may be that small changes occur in QoL, such as going from 23 (low QoL) to 26 (high QoL) on the total sum score for QoL (35 points). It was estimated that with 70

1  
2  
3 participants, we would be able to detect a 10% change in QoL over a one-year follow-up  
4  
5 period. Similarly, with a power of 80% at the 0.05 level, we would be able to identify small  
6  
7 changes in SPH, such as going from three to four on the five-point Likert-scale, with 93  
8  
9 participants. To account for losses to follow-up and be able to do subgroup analyses, we  
10  
11 aimed to recruit all individuals who fulfilled the eligibility criteria. In total, 676 fitness club  
12  
13 members wanted to participate in the study. We excluded those who already exercised  
14  
15 regularly (n=270) or had cardiovascular disease, hypertension or asthma (n=8). Besides,  
16  
17 148 individuals did not respond after the first e-mail, leaving 250 enrolling in the study  
18  
19 (Figure 1).  
20  
21  
22  
23  
24  
25

### 26 **Patient and Public involvement**

27  
28 Four volunteers completed a pilot test of the whole electronic questionnaire, which led to  
29  
30 minor changes in wording and format. Otherwise, participants and the public have not been  
31  
32 involved in the development of research questions, study design or recruitment.  
33  
34  
35  
36  
37

### 38 **Data-collection and measurements**

39  
40 A standardized electronic questionnaire was answered at onset and after three, six and 12  
41  
42 months' fitness club membership. A pretest of the questionnaire was conducted by four  
43  
44 members in the research group, as well as four volunteers. The final questionnaire contained  
45  
46 52 questions at onset and 65 questions at three, six and 12 months. At all time-points, the  
47  
48 questionnaire took approximately 30 minutes to complete and was answered electronically.  
49  
50  
51  
52  
53

54 SPH was assessed by answering a global single question: "*In general, how would you rate*  
55  
56 *your health today?*". The response options were ranked from 1-5, with the following  
57  
58 description: excellent, good, moderate, fair and poor. According to these five levels, we also  
59  
60

1  
2  
3 divided the participants into two categories: high SPH (excellent and good) and low SPH  
4  
5 (moderate, fair and poor) to investigate the association between SPH and exercise behavior,  
6  
7 an approach adopted by other researchers (32,33).  
8  
9

10  
11  
12 QoL was measured by a Norwegian version of the Satisfaction of Life Scale (SWLS) (34).

13  
14 Because of multiple assessment-points, and a comprehensive questionnaire covering several  
15  
16 factors influencing exercise adherence (24-27), we decided after discussion in the project  
17  
18 group to use SWLS. The SWLS is short and includes five statements only. Several studies  
19  
20 have also supported the validity and reliability of the scale (35-38). QoL is measured on a 7-  
21  
22 item scale, where the participants rate five different statements from "strongly disagree" =  
23  
24 1 to "strongly agree" = 7:  
25  
26

- 27  
28 1. *"In most ways, my life is close to my ideal"*
- 29  
30 2. *"The conditions of my life are excellent"*
- 31  
32 3. *"I am satisfied with my life"*
- 33  
34 4. *"So far I have gotten the important things I want in life"*
- 35  
36 5. *"If I could live my life over, I would change almost nothing"*  
37  
38  
39  
40  
41

42  
43 The results from QoL were analyzed separately for each statement and as a sum score (31,39-  
44  
45 41), and we also dichotomized QoL into two main groups; low QoL (scores 5-25) and high  
46  
47 QoL (scores 26-35).  
48  
49

50  
51 To examine the role of regular exercise on SPH and QoL, we asked the participants to report  
52  
53 exercise involvement at the fitness club in the last four weeks: 1) *"Have you been a*  
54  
55 *member?": "yes" or "no", 2) "Have you been exercising regularly?": "yes" or "no", 3) "How*  
56  
57 *often have you exercised per week on average?": "once a week", "twice a week", "three times*  
58  
59  
60

1  
2  
3 a week", "four times a week", "five times a week", "six times a week" or "seven times a week  
4  
5 or more". In line with Garber et al. (14), non-regular use was defined as exercising one  
6  
7 session/week, or no exercise the last month, whereas regular use of the fitness club was  
8  
9 defined as exercising  $\geq 2$  times a week. Hence, membership dropouts were counted in the  
10  
11 non-regular users of the gym.  
12  
13

14 Information related to demographic variables and socioeconomic status were obtained from  
15  
16 the questionnaire answered at onset, covering age, gender, body weight, level of education,  
17  
18 total household income, cohabitation, children and occupation.  
19  
20  
21  
22

### 23 **Statistical analyses**

24  
25  
26 Statistical Package for the Social Sciences (SPSS) – 25.0 for Windows was used for statistical  
27  
28 analysis. Data are presented as numbers with percentages or means with standard deviations  
29  
30 (SD), as well as Odds Ratio (OR) with 95% Confidence Intervals (CI) and p-values.  
31  
32

33 Chronbach's  $\alpha$  for the SWLS was 0.87, 0.91, 0.90 and 0.91 at baseline, and after three, six  
34  
35 and 12 months, respectively. Chi-square analysis was used to compare categorical variables  
36  
37 and two-sided independent sample t-test for continuous variables (Table 1). In addition, Mc  
38  
39 Nemars test, Cochran's Q, paired sample t-test and one way repeated measure ANOVA were  
40  
41 used to analyze changes in SPH and QoL. Data (Table 2 and 3) are reported for participants  
42  
43 who completed the questionnaire at onset of fitness club membership (n=250), three months  
44  
45 (n=224), six months (n=213) and 12 months (n=187), whereas p-values are shown for  
46  
47 participants that completed the questionnaire at all measurements points only (n=184). Also,  
48  
49 due to the ethics of mandatory questionnaire responses, we included "I do not want to  
50  
51 answer" or "Not relevant" as response options, which in the SPSS data set were treated as  
52  
53 missing values, so individual questions may have varying response rates.  
54  
55  
56  
57  
58  
59  
60

1  
2  
3 To assess the difference between those who reported regular use of the fitness club (n=70),  
4 with those who did not (n=93) on SPH and QoL, we included prospective data obtained at 12  
5 months (Table 4). Based on previous literature (42-44) and crude analysis comparing  
6 demographic and health factors between high and low SPH, and high and low QoL, seven  
7 variables (exercise, age, cohabitation, total household income, Body Mass Index (BMI),  
8 children and gender) with p-values  $\leq 0.05$  (Table 1), were all entered in the above order in the  
9 adjusted model (Table 5).  
10  
11  
12  
13  
14  
15  
16  
17  
18  
19  
20  
21  
22  
23  
24  
25  
26  
27  
28  
29  
30  
31  
32  
33  
34  
35  
36  
37  
38  
39  
40  
41  
42  
43  
44  
45  
46  
47  
48  
49  
50  
51  
52  
53  
54  
55  
56  
57  
58  
59  
60

## RESULTS

General characteristic of all participants at onset of fitness club membership, divided into high and low SPH and QoL, is shown in Table 1. In total, 66.4% and 35.2% rated their SPH and QoL as high, respectively. There were no gender differences concerning SPH, but more women (41.9%) than men (28.8%) rated their QoL as high. The high SPH group had lower age, mean BMI and fewer were overweight or obese compared with the low SPH group.

Participants with high QoL had higher age and were more likely to report high total household income, living with a partner and having children than the low QoL group (Table 1).

**Table 1:** General characteristics of the participants at onset of fitness club membership, divided into high and low SPH and QoL (n=250).

| Background variable                                | All<br>(n=250) | SPH<br>High<br>(n=166) | Low<br>(n=83) | p-value | QoL<br>High<br>(n=88) | Low<br>(n=161) | p-value |
|----------------------------------------------------|----------------|------------------------|---------------|---------|-----------------------|----------------|---------|
| Norwegian descent [n (%)]                          | 196 (78.4)     | 134 (80.7)             | 62 (74.7)     | 0.630   | 65 (73.9)             | 130 (80.7)     | 0.428   |
| Gender: Men [n (%)]                                | 125 (50.0)     | 83 (50.0)              | 42 (50.6)     | 1.000   | 36 (40.9)             | 89 (55.3)      | 0.042   |
| Age (years) [mean (SD) ]                           | 36.4 (11.3)    | 34.5 (10.5)            | 40.1 (11.9)   | <0.001  | 38.5 (12.1)           | 35.2(10.6)     | 0.027   |
| Age ≥ 40 years [n (%)]                             | 81             | 43                     | 37            | 0.010   | 33                    | 47             | 0.230   |
| BMI [mean (SD)]                                    | 25.7 (4.4)     | 25.2 (4.0)             | 26.6 (5.0)    | 0.017   | 25.3 (4.1)            | 25.9 (4.5)     | 0.263   |
| BMI ≥ 25 (overweight or obese) [n (%)]             | 121 (48.4)     | 72 (43.4)              | 48 (57.8)     | 0.044   | 36 (40.9)             | 85 (52.8)      | 0.097   |
| Education level:<br>University ≥ 4 years [n (%)]   | 102 (40.8)     | 66 (39.8)              | 36 (44.4)     |         | 40 (45.5)             | 61 (37.9)      | 0.304   |
| Total household income:<br>High > 87 500\$ [n (%)] | 114 (45.6)     | 74 (47.4)              | 40 (51.3)     |         | 51 (62.2)             | 62 (40.8)      | 0.003   |
| Living with a partner [n (%)]                      | 153 (61.2)     | 102 (61.4)             | 50 (60.2)     | 0.963   | 70 (79.5)             | 82 (50.9)      | <0.001  |
| Children                                           | 80 (32)        | 50 (31.1)              | 29 (34.9)     | 0.531   | 36 (40.9)             | 44 (27.3)      | 0.040   |
| Employed outside of home [n (%)]                   | 185 (74.0)     | 120 (72.3)             | 64 (77.1)     | 0.134   | 63 (71.6)             | 122 (75.8)     | 0.142   |

At onset, more men than women had a household income  $\geq$ 87 500 US dollar (52.0% versus 39.2%), worked outside the home (86.4% versus 61.6%), were overweight or obese (BMI  $\geq$ 25 kg/m<sup>2</sup>, 58.4% versus 38.7%) and older (38.5 years versus 34.3 years). More details of the study participants have been published previously (22-25). Throughout the initial year of fitness club membership, we found no changes in SPH (Table 2).

**Table 2:** SPH at onset, three, six and 12 months of fitness club membership. Results are shown in mean and standard deviation (SD) or numbers (n) and %. P-values are shown for participants that completed the questionnaire at all measurement points (n=184).

| Outcomes            | Onset<br>n=250<br>(men=125,<br>women=125) | Three months<br>n=224<br>(men=108,<br>women=116) | Six months<br>n=213<br>(men=106,<br>women=107) | 12 months<br>n=187<br>(men=96,<br>women=91) | p-value |
|---------------------|-------------------------------------------|--------------------------------------------------|------------------------------------------------|---------------------------------------------|---------|
| <b>SPH:</b>         |                                           |                                                  |                                                |                                             |         |
| Mean score (SD)     | 2.3 (0.7)                                 | 2.2 (0.8)                                        | 2.1 (0.7)                                      | 2.2 (0.7)                                   | 0.313   |
| High SPH [n (%)]    | 166 (66.7)                                | 158 (70.5)                                       | 158 (74.2)                                     | 128 (68.4)                                  | 0.359   |
| Low SPH n [(%)]     | 83 (33.3)                                 | 66 (29.5)                                        | 55 (25.8)                                      | 59 (31.6)                                   |         |
| - Excellent [n (%)] | 31 (12.4)                                 | 31 (13.8)                                        | 37 (17.4)                                      | 27 (14.4)                                   | 0.532   |
| - Good [n (%)]      | 135 (54.0)                                | 127 (56.7)                                       | 121 (56.8)                                     | 101 (54.0)                                  | 0.841   |
| - Moderate [n (%)]  | 73 (29.2)                                 | 54 (24.1)                                        | 48 (22.5)                                      | 51 (27.3)                                   | 0.430   |
| - Fair [n (%)]      | 8 (3.2)                                   | 10 (4.5)                                         | 6 (2.8)                                        | 8 (4.3)                                     | 0.943   |
| - Poor [n (%)]      | 2 (0.8)                                   | 2 (0.9)                                          | 1 (0.5)                                        | 0 (0.0)                                     | 0.300   |
| *Missing [n (%)]    | 1 (0.4)                                   | 0 (0.0)                                          | 0 (0.0)                                        | 0 (0.0)                                     | -       |

In QoL measurements, we observed an increase in mean scores for all five statements, a significant increase in two out of five statements: “*In most ways, my life is close to my ideal*” (p=0.036) and “*If I could live my life over, I would change almost nothing*” (p<0.001), and also an improvement in sum score (p = 0.071) (Table 3).

**Table 3:** QoL at onset, three, six and 12 months of fitness club membership. Results are shown in mean and standard deviation (SD) or numbers (n) and %. P-value is shown for participants that completed the questionnaire at all measurement points (n=184).

| Outcomes                                                                  | Onset<br>n=250<br>(men=125,<br>women=125) | Three months<br>n=224<br>(men=108,<br>women=116) | Six months<br>n=213<br>(men=106,<br>women=107) | 12 months<br>n=187<br>(men=96,<br>women=91) | p-value                                                                                            |
|---------------------------------------------------------------------------|-------------------------------------------|--------------------------------------------------|------------------------------------------------|---------------------------------------------|----------------------------------------------------------------------------------------------------|
| <b>QoL:</b>                                                               |                                           |                                                  |                                                |                                             |                                                                                                    |
| Sum score QoL [mean (SD)]                                                 | 22.2(6.7)                                 | 22.2(7.1)                                        | 22.5(6.9)                                      | 23.2(6.8)                                   | 0.071                                                                                              |
| High QoL [n (%)]                                                          | 88 (35.3)                                 | 76 (34.2)                                        | 79 (37.1)                                      | 76 (41.1)                                   | 0.263                                                                                              |
| Low QoL [n (%)]                                                           | 161 (64.7)                                | 146 (65.8)                                       | 134 (62.9)                                     | 109 (58.9)                                  |                                                                                                    |
| «In most ways my life is close to my ideal» [mean (SD)]                   | 4.1 (1.5)                                 | 4.3 (1.6)                                        | 4.3 (1.6)                                      | 4.4 (1.6)                                   | 0.036<br>(onset to 12 months;<br>p=0.025)                                                          |
| «The conditions of my life are excellent» [mean (SD)]                     | 4.7 (1.5)                                 | 4.7 (1.5)                                        | 4.7 (1.5)                                      | 4.8 (1.5)                                   | 0.356                                                                                              |
| «I am satisfied with my life» [mean (SD)]                                 | 4.9 (1.6)                                 | 4.8 (1.6)                                        | 4.9 (1.5)                                      | 5.0 (1.5)                                   | 0.216                                                                                              |
| «So far I have gotten the important things I want in life» [mean (SD)]    | 4.5 (1.7)                                 | 4.4 (1.7)                                        | 4.5 (1.6)                                      | 4.7 (1.6)                                   | 0.068                                                                                              |
| «If I could live my life over, I would change almost nothing» [mean (SD)] | 4.0 (1.9)                                 | 4.0 (1.8)                                        | 4.1 (1.8)                                      | 4.3 (1.8)                                   | <0.001<br>(onset to 12 months;<br>p<0.001, 3 to 12<br>months; p=0.001, 6 to<br>12 months; p=0.001) |

At all measurements, regular use of the fitness club was associated with high SPH, as well as higher sum scores on QoL at 12 months follow-up (Table 4). There was a large drop in participants reporting regular use of the fitness club ( $\geq 2$  times a week) from three (51.8%) to six (37.6%) and 12 (37.4%) months ( $p = 0.003$ ), with no gender or age differences. More details of exercise behavior at the gym are previously reported (21-24).



**Table 4:** SPH and QoL compared in participants reporting regular and non-regular use at a fitness center at three, six and 12 months. Results are shown in mean and standard deviation (SD) or numbers (n) and %.

|                           | Three months        |                         |         | Six months         |                         |         | 12 months          |                        |         |
|---------------------------|---------------------|-------------------------|---------|--------------------|-------------------------|---------|--------------------|------------------------|---------|
|                           | Regular use (n=116) | Non-regular use (n=106) | p-value | Regular use (n=80) | Non-regular use (n=125) | p-value | Regular use (n=70) | Non-regular use (n=93) | p-value |
| <b>SPH:</b>               |                     |                         |         |                    |                         |         |                    |                        |         |
| Mean score (SD)           | 2.1 (0.7)           | 2.4 (0.8)               | 0.001   | 1.9 (0.7)          | 2.3 (0.8)               | 0.001   | 1.9 (0.7)          | 2.4 (0.7)              | <0.001  |
| High SPH [n (%)]          | 91 (78.4)           | 67 (63.2)               | 0.018   | 67 (83.8)          | 85 (68.0)               | 0.015   | 59 (84.3)          | 57 (61.3)              | 0.002   |
| Low SPH [n (%)]           | 25 (21.6)           | 39 (36.7)               |         | 13 (16.2)          | 40 (32.0)               |         | 11 (15.8)          | 36 (38.7)              |         |
| <b>QoL:</b>               |                     |                         |         |                    |                         |         |                    |                        |         |
| Sum score QoL [mean (SD)] | 22.5 (6)            | 21.8 (7.6)              | 0.469   | 22.6 (7.2)         | 22.5 (6.8)              | 0.954   | 25.1 (5.5)         | 22.0(7.0)              | 0.002   |
| High QoL [n (%)]          | 39 (34.2)           | 36 (34.0)               | 1.000   | 35 (43.8)          | 42 (33.6)               | 0.177   | 34 (49.3)          | 34 (36.6)              | 0.144   |
| Low QoL [n (%)]           | 75 (65.8%)          | 70 (66.0)               |         | 45 (56.2)          | 83 (66.4)               |         | 35 (50.7)          | 59 (63.4)              |         |

Participants not reporting regular use of the fitness club were n = 2, n = 8, and n = 24 at three, six and 12 months, respectively.

Also after adjusting for confounders (age, cohabitation, total household income, BMI, children and gender), regular use of the fitness club  $\geq$  two times weekly was associated with reporting high SPH (OR 3.532 [95% CI 1.60 to 7.82], p=0.002) and QoL (OR 1.914 [95% CI 0.95 to 3.86], p=0.069) (Table 5).

**Table 5:** The association between use of a fitness club and High SPH / QoL at 12 months, controlled for age, cohabitation, total household income, BMI, children, and gender.

| Outcomes                                             | High SPH (n=128 (68.4%)) |                 |                           |         | High QoL (n=76 (40.6)) |                 |                           |         |
|------------------------------------------------------|--------------------------|-----------------|---------------------------|---------|------------------------|-----------------|---------------------------|---------|
|                                                      | %                        | Odds Ratio (OR) | 95%CI for OR, lower-upper | p-value | %                      | Odds Ratio (OR) | 95%CI for OR, lower-upper | p-value |
| Regular use (frequency $\geq$ two times weekly)      | 59 (50.9%)               | 3.532           | 1.595-7.821               | 0.002   | 34 (44.7%)             | 1.914           | 0.950-3.856               | 0.069   |
| Age (> 40 years)                                     | 44 (34.4%)               | 1.150           | 0.506-2.613               | 0.738   | 23 (30.3%)             | 1.388           | 0.636-3.032               | 0.410   |
| Living with a partner (yes)                          | 83 (64.8%)               | 0.644           | 0.274-1.509               | 0.311   | 57 (75%)               | 0.369           | 0.161-0.849               | 0.019   |
| High household income ( $\geq$ 87 500\$ per year)    | 59 (48.8%)               | 0.972           | 0.405-2.332               | 0.950   | 39 (51.3%)             | 1.214           | 0.540-2.726               | 0.639   |
| Body Mass Index (BMI) ( $\geq$ 25kg/m <sup>2</sup> ) | 66 (51.6%)               | 1.120           | 0.524-2.392               | 0.770   | 31 (40.8%)             | 1.985           | 0.983-4.010               | 0.056   |
| Children (yes)                                       | 37 (28.9%)               | 0.833           | 0.353-1.964               | 0.676   | 24 (31.6%)             | 1.072           | 0.480-2.395               | 0.866   |
| Gender (man)                                         | 70 (54.7%)               | 0.733           | 0.348-1.546               | 0.415   | 36 (47.4%)             | 1.387           | 0.688-2.796               | 0.360   |

1  
2  
3 To evaluate if the participants were representative of our initial study population, a  
4  
5 comparison analysis was performed with the 63 participants lost to follow-up at 12 months.  
6  
7 Mean scores at onset were  $2.3 \pm 0.7$  (all) and  $2.4 \pm 0.9$  (lost to follow-up), and  $22.2 \pm 6.7$  (all)  
8  
9 and  $21.4 \pm 6.5$  (lost to follow-up) for SPH and QoL, respectively. No differences were found  
10  
11 in demographic and socioeconomic variables (data not shown).  
12  
13  
14  
15  
16  
17  
18  
19  
20  
21  
22  
23  
24  
25  
26  
27  
28  
29  
30  
31  
32  
33  
34  
35  
36  
37  
38  
39  
40  
41  
42  
43  
44  
45  
46  
47  
48  
49  
50  
51  
52  
53  
54  
55  
56  
57  
58  
59  
60

## DISCUSSION

To our knowledge, this is the first study that has investigated SPH and QoL among beginner recreational exercisers in a fitness club setting. The main findings were an increase in mean scores for all five statements in QoL, even if only two of the statements reached statistical significance. We also found an improvement in QoL sum score throughout the one-year follow-up period. No changes were observed for SPH during the initial year of fitness club membership. Regularly fitness club users rated SPH higher at all measurement points, as well as perceived their QoL higher than non-regular users at 12 months follow-up.

We found no changes in SPH throughout the follow-up period, which is contrary to another study investigating SPH among healthy adults (5). One explanation to this may be that more than half of the participants (66.7%) in our study rated their SPH as high already at onset of fitness club membership, which caused less opportunity for further improvement. Also, very few (4%) rated their SPH fair or poor at onset. As such, the ceiling effect in SPH might be a cause for our results. Previous research on the association between exercise and SPH have primarily been done among sick or elderly populations, reporting that regular physical activity and even a small dose of regular exercise (defined as engaging in activities more than once a week, in line with our definition of regular use of the gym) may improve SPH (45,46).

Precise definitions of QoL are scant and measures vary greatly (47). Still, research including systematic reviews and meta-analysis has suggested that regular exercise may enhance QoL and contribute to emotional wellbeing (18,19,47). This is consistent with the present study, where regular exercise at the fitness club was associated with higher scores in perceived QoL. Our data also give some support for a dose-response curve and a threshold of at least twice weekly to achieve benefits in SPH and QoL. However, we cannot conclude that exercise

1  
2  
3 contributes to QoL, or if it is the other way around. We found, however, that QoL score  
4 increased from onset of membership to 12 months follow-up, lending credibility to the  
5 hypothesis that improvement in QoL might be a key motivator for sustained exercise (48).  
6  
7 However, social and cognitive factors (such as social interactions while exercising, group  
8 cohesion and self-efficacy) may confound the association between regular use of a fitness  
9 club and QoL. In line with others, we believe that these factors might have a mediating role,  
10 rather than being real confounding factors (48,49). Throughout the follow-up period, there  
11 was an increase in two out of five statements of QoL and an improvement in the total sum  
12 score. The three non-significant statements could be explained by a higher rating already at  
13 onset, and a possible ceiling effect, which we also discussed earlier regarding SPH. Besides,  
14 the SWLS focuses to a large extent on how the participants feel and think with respect to  
15 several important aspects from a life-long perspective (from birth and up to date). Hence, it  
16 can be difficult to rationalize our results and the influence of joining a fitness club, whatever  
17 the findings.  
18  
19  
20  
21  
22  
23  
24  
25  
26  
27  
28  
29  
30  
31  
32  
33  
34  
35  
36  
37

### 38 **Participants**

39  
40 More than 60% of the participants did not manage to visit the fitness club regularly after six  
41 and 12 months the initial year of membership. Others have also reported a high drop-out rate  
42 (50%) from regular use of the fitness club within the first six to 12 months of membership  
43 (50,51). A retrospective study found that only 10% of fitness club members reported regular  
44 gym attendance (at least four visits monthly) after six months (52). In our study, this number  
45 was higher. Nevertheless, this shows that maintaining an active lifestyle can be challenging  
46 even for motivated individuals, and it highlights the need to develop strategies and  
47 interventions to facilitate exercise behavior in a fitness club setting. It may be useful to  
48 understand that regular exercise can contribute to increased SPH and QoL. Finding time is  
49  
50  
51  
52  
53  
54  
55  
56  
57  
58  
59  
60

1  
2  
3 vital if regular use is to be adhered to. Even though most fitness clubs are located where  
4 people live and travel, have flexible opening hours, many also offering childcare, former  
5 physically inactive individuals may have had problems getting into a weekly routine (53).  
6  
7  
8  
9  
10

## 11 **Outcomes**

12 Both SPH and QoL were measured by a standardized electronic questionnaire at all time-  
13  
14 points. The use of an electronic questionnaire based on previously validated surveys made it  
15 easy to gather responses quickly and eliminate the costs associated with printing and  
16 distributing paper-based questionnaires. Self-report is inexpensive, takes up little time to  
17 conduct and is practical. Anyway, due to social desirability, the risk of over-reporting may be  
18 high. For instance, individuals may report more socially acceptable answers rather than being  
19 honest and may interpret the wording of questions differently (54). However, assessment of  
20 SPH and QoL depends on the individual, subjective perception. Hence, self-report may be an  
21 appropriate measurement method for measuring SPH and QoL.  
22  
23  
24  
25  
26  
27  
28  
29  
30  
31  
32  
33  
34  
35  
36  
37

38 SPH was assessed by answering a global single question used in numerous other studies and  
39 subjective assessment of health has been found to highly correlate with results of its objective  
40 assessment and health status indices (55). QoL was measured by a Norwegian version of  
41 SWLS which is considered to be a reliable and valid instrument and has been widely used to  
42 examine the subjective QoL of people experiencing different health concerns (30,40).  
43  
44  
45  
46  
47  
48  
49  
50

## 51 **Strengths and limitations**

52 A strength of the present study was the use of prospective study design with 12 months  
53 follow-up. Also, the inclusion of data concerning personal health behaviors (BMI and  
54 exercise) and demographics (age, cohabitation, total household income, having children) is  
55  
56  
57  
58  
59  
60

1  
2  
3 considered strengths. Hence, we were able to adjust for these factors in the analyses. All  
4 participants were untrained at study enrollment and may as such be considered representative  
5 for new members at fitness clubs (27), as well as comparable to the general adult population  
6 (56). There was an equal number of men and women and we used valid and reliable  
7 measurement methods (30,32). Despite a high dropout from the study itself, we had a  
8 sufficient number of participants at all measurement points regarding a priori power  
9 calculation for SPH and QoL.  
10  
11  
12  
13  
14  
15  
16  
17  
18  
19  
20

21 Limitations were that the investigation was carried out in Norwegian only, excluding  
22 participants from other ethnic groups, as well as that attendance at the fitness club was self-  
23 reported. Studies are consistent in showing that individuals tend to overestimate what they do  
24 (57,58). Nevertheless, if this was the case, the results of the present study provide a  
25 conservative calculation of exercise involvement at the fitness club. The questionnaire took  
26 approximately 30 minutes to complete and was answered electronically. Such a time-  
27 consuming questionnaire might cause more losses to follow-up. Further, participation was  
28 voluntary, and it may be possible that the data contain a certain level of volunteer-bias,  
29 questioning the representativeness of the results.  
30  
31  
32  
33  
34  
35  
36  
37  
38  
39  
40  
41  
42  
43  
44

## 45 **Conclusion**

46 We found an increase in all five statements in QoL, while only two of the items reached  
47 statistical significance. We also found an improvement in the QoL sum score, whereas no  
48 changes were observed in SPH during the first year of fitness club membership. Our results  
49 add to the literature that regular attendance at the fitness club after 12 months was associated  
50 with a high SPH and QoL.  
51  
52  
53  
54  
55  
56  
57  
58  
59  
60

### Acknowledgments

The authors thank Ingar Holme and Morten Fagerland, professors in biostatistics, Norwegian School of Sports Sciences, for guidance with power considerations and statistical analysis.

For peer review only

## Footnotes

· **Contributors** HH outlined the manuscript. CG plotted all data and developed the questionnaire together with LAHH. CG and LAHH were responsible for data collection and recruited the participants. HH, CG and LAHH did the testing. LAHH originated the idea for the present study and supervised the project. All authors participated in discussing the design of the study, read and corrected draft versions of the manuscript and approved the final manuscript.

· **Competing interests** None declared.

· **Funding** The project was financed by and conducted at the Norwegian School of Sports Sciences.

· **Ethics approval** The project was reviewed by the Regional Committee for Medical and Health Research Ethics (REK 2015/1443 A), who concluded that, according to the Act on medical and health research (the Health Research Act 2008), the study did not require full review by REK. The project was approved by the Norwegian Social Science Data Service (NSD 44135).

· **Data sharing statement** All data are fully available without restriction. Data are from the 'Physical activity at fitness clubs. -A venue for public health'-a study whose authors may be contacted at the Norwegian School of Sports Sciences. [Hege.heiestad@nih.no](mailto:Hege.heiestad@nih.no).

· **Patient consent for publication** Not required.



## References:

1. Choi, J., et al., Correlates associated with participation in physical activity among adults: a systematic review of reviews and update. *BMC Public Health*, 2017. 17(1): p. 356
2. Teixeira PJ, Carraca EV, Markland D, Silva MN, Ryan RM. Exercise, physical activity, and self-determination theory: a systematic review. *Int J Behav Nutr Phys Act*. 2012;9:78
3. World Health Organization. (2014). *Basic documents*. World Health Organization.
4. Falconer, J., & Quesnel-Vallée, A. (2017). Pathway from poor self-rated health to mortality: Explanatory power of disease diagnosis. *Social Science & Medicine*, 190, 227-236.
5. Bamia, C., Orfanos, P., Juerges, H., Schöttker, B., Brenner, H., Lorbeer, R., ... & Lagiou, P. (2017). Self-rated health and all-cause and cause-specific mortality of older adults: Individual data meta-analysis of prospective cohort studies in the CHANCES Consortium. *Maturitas*, 103, 37-44.
6. Barger, S. D., Cribbet, M. R., & Muldoon, M. F. (2016). Participant-reported health status predicts cardiovascular and all-cause mortality independent of established and nontraditional biomarkers: evidence from a representative US sample. *Journal of the American Heart Association*, 5(9), e003741.
7. Bopp, M., Braun, J., Gutzwiller, F., Faeh, D., & Swiss National Cohort Study Group. (2012). Health risk or resource? Gradual and independent association between self-rated health and mortality persists over 30 years. *PloS one*, 7(2), e30795.
8. Vingård, E., Alexanderson, K., & Norlund, A. (2004). Chapter 9. Consequences of being on sick leave. *Scandinavian journal of public health*, 32(63\_suppl), 207-215
9. Miilunpalo, S., Vuori, I., Oja, P., Pasanen, M., & Urponen, H. (1997). Self-rated health status as a health measure: the predictive value of self-reported health status on the use of physician services and on mortality in the working-age population. *Journal of clinical epidemiology*, 50(5), 517-528.
10. Chodzko-Zajko WJ, Proctor DN, Fiatarone Singh MA, Minson CT, Nigg CR, Salem GJ, et al. (2009). Exercise and physical activity for older adults. *Med Sci Sports Exerc* 2009;41(7):1510-1530.
11. World Health Organization. (1996). Health interview surveys: Towards international harmonization of methods and instruments (Vol. 58). Copenhagen, Denmark: World Health Organization Regional Office for Europe.
12. Lee, Y. (2000). The predictive value of self-assessed general, physical, and mental health on functional decline and mortality in older adults. *Journal of Epidemiology & Community Health*, 54(2), 123-129.
13. Lera-Lopez, F., Ollo-López, A., Garrués-Irisarri, M. et al. *Eur J Ageing* (2019) 16:3. <https://doi.org/10.1007/s10433-018-0471-6>
14. Garber, C.E., et al. (2011). *American College of Sports Medicine position stand. Quantity and quality of exercise for developing and maintaining cardiorespiratory, musculoskeletal, and neuromotor fitness in apparently healthy adults: guidance for prescribing exercise*. *Med Sci Sports Exerc*, 2011. 43(7): p. 1334-59.
15. Weinberg, R. S., & Gould, D. (2018). *Foundations of Sport and Exercise Psychology*, 7E. Human Kinetics. Ch18, p423-433
16. D. L., Hammond, C. C., Reifsteck, E. J., Jehu, C. M., Williams, R. A., Adams, M. M., ... & Shang, Y. T. (2013). Physical activity and quality of life. *Journal of Preventive Medicine and Public Health*, 46(Suppl 1), S28.
17. Awick, E. A., Ehlers, D. K., Aguiñaga, S., Daugherty, A. M., Kramer, A. F., & McAuley, E. (2017). Effects of a randomized exercise trial on physical activity, psychological distress and quality of life in older adults. *General hospital psychiatry*, 49, 44-50.
18. Gillison FB, Skevington SM, Sato A, Standage M, Evangelidou S. (2009). The effects of exercise interventions on quality of life in clinical and healthy populations: a meta-analysis. *Soc Sci Med* 2009; 68(9):1700-1710.
19. Bize R, Johnson JA, Plotnikoff RC. (2007). Physical activity level and health-related quality of life in the general adult population: a systematic review. *Prev Med* 2007;45(6):401-415.
20. Gill, D. L., Hammond, C. C., Reifsteck, E. J., Jehu, C. M., Williams, R. A., Adams, M. M., ... & Shang, Y. T. (2013). Physical activity and quality of life. *Journal of Preventive Medicine and Public Health*, 46(Suppl 1), S28.
21. Cherry, K. (2018). Cross-sectional research method: How does it work. *Advantages and challenges. Student Resources*. Available online from <https://www.verywellmind.com/cross-sectional-research-how-does-it-work>.
22. The International Health, R.S.A., *The IHRS Global Report 2019*. (2019).
23. Sperandei, S., M.C. Vieira, and A.C. Reis. (2016). *Adherence to physical activity in an unsupervised setting: Explanatory variables for high attrition rates among fitness center members*. *Journal of Science and Medicine in Sport*, 2016. 19(11): p. 916-920.

24. Gjestvang, C., Stensrud, T., & Haakstad, L. A. (2019). Are changes in physical fitness, body composition and weight associated with exercise attendance and dropout among fitness club members? A longitudinal prospective study. *BMJ Open*, 9(4), e027987.
25. Gjestvang, C., Stensrud, T., & Haakstad, L. A. (2017). How is the rating of perceived capacity related to VO<sub>2</sub>max and what is VO<sub>2</sub>max at onset of training?. *BMJ open sport & exercise medicine*, 3(1), e000232.
26. Gjestvang, C., Stensrud, T., Hansen, B. H., Kolle, E., & Haakstad, L. A. H. (2019). Are Fitness Club Members More Likely To Meet Physical Activity Guidelines Than The General Adult Population?: 3035: Board# 81 May 31 3: 30 PM-5: 00 PM. *Medicine & Science in Sports & Exercise*, 51(6), 835
27. Haakstad, L. A., Gjestvang, C., Lamerton, T., & Bø, K. (2020). Urinary incontinence in a fitness club setting—is it a workout problem?. *International Urogynecology Journal*, 1-8 (25).
28. Hawley-Hague, H.H., M; Skelton, D.A; Todd, C., *Review of how we should define (and measure) adherence in studies examining older adults' participation in exercise classes*. *BMJ Open Sport Exerc Med*, 2016. 6: p. 6.
29. Doblhammer, G., & Gumà, J. (Eds.). (2018). *A Demographic Perspective on Gender, Family and Health in Europe*. Springer International Publishing.
30. Pavot, W., & Diener, E. (2009). Review of the satisfaction with life scale. In *Assessing well-being* (pp. 101-117). Springer, Dordrecht.
31. Springer, Dordrecht, and Corrigan, J. D., Kolakowsky-Hayner, S., Wright, J., Bellon, K., & Carufel, P. (2013). The satisfaction with life scale. *The Journal of head trauma rehabilitation*, 28(6), 489-491.
32. Machón, M., Vergara, I., Dorronsoro, M., Vrotsou, K., & Larrañaga, I. (2016). Self-perceived health in functionally independent older people: associated factors. *BMC geriatrics*, 16(1), 66.
33. Girón, P. (2012). Is age associated with self-rated health among older people in Spain? *Central European Journal of public health*, 20(3), 185.
34. Diener, E., Emmons, R. A., Larsen, R. J., & Griffin, S. (1985). The Satisfaction With Life Scale. *Journal of personality assessment*, 49(1), 71-75. DOI: 10.1207/s15327752jpa4901\_13
35. Pavot, William, & Diener, Ed. (2008). The satisfaction with life scale and the emerging construct of life satisfaction. *The Journal of Positive Psychology*, 3(2), 137-152.
36. Tessier, P., Blanchin, M., & Sébille, V. (2017). Does the relationship between health-related quality of life and subjective well-being change over time? An exploratory study among breast cancer patients. *Social Science & Medicine*, 174, 96-103.
37. Pavot, W., Diener, E. D., Colvin, C. R., & Sandvik, E. (1991). Further validation of the Satisfaction with Life Scale: Evidence for the cross-method convergence of well-being measures. *Journal of personality assessment*, 57(1), 149-161.
38. Jovanović, V., Lazić, M., & Gavrilov-Jerković, V. (2020). Measuring life satisfaction among psychiatric patients: Measurement invariance and validity of the Satisfaction with Life Scale. *Clinical Psychology & Psychotherapy*.
39. Kobau, R., Sniezek, J., Zack, M. M., Lucas, R. E., & Burns, A. (2010). Well-being assessment: An evaluation of well-being scales for public health and population estimates of well-being among US adults. *Applied Psychology: Health and Well-Being*, 2(3), 272-297.
40. Clench-Aas, J., Nes, R. B., Dalgard, O. S., & Aarø, L. E. (2011). Dimensionality and measurement invariance in the Satisfaction with Life Scale in Norway. *Quality of Life Research*, 20(8), 1307-1317.
41. Vittersø, J. (2009). Satisfaction with life scale. *Tidsskrift for norsk psykologiforening*, 46, 757-758.
42. Ogbeide, S. A., Neumann, C. A., Sandoval, B. E., & Rudebock, C. D. (2010). Gender differences between body weight and psychological well-Being during young adulthood: A brief report. *The New School Psychology Bulletin*, 8(1), 41-46
43. Pino-Domínguez, L., Navarro-Gil, P., González-Vélez, A. E., Prieto-Flores, M. E., Ayala, A., Rojo-Pérez, F., ... & Forjaz, M. J. (2016). Self-perceived health status, gender, and work status. *Journal of women & aging*, 28(5), 386-394
44. [https://ec.europa.eu/eurostat/statistics-explained/index.php/Self-perceived\\_health\\_statistics](https://ec.europa.eu/eurostat/statistics-explained/index.php/Self-perceived_health_statistics)
45. Bherer, L., Erickson, K. I., & Liu-Ambrose, T. (2013). A review of the effects of physical activity and exercise on cognitive and brain functions in older adults. *Journal of aging research*, 2013.
46. Chapman, S. B., Aslan, S., Spence, J. S., DeFina, L. F., Keebler, M. W., Didehbani, N., & Lu, H. (2013). Shorter-term aerobic exercise improves brain, cognition, and cardiovascular fitness in aging. *Frontiers in aging neuroscience*, 5, 75.
47. Gillison, F. B., Skevington, S. M., Sato, A., Standage, M., & Evangelidou, S. (2009). The effects of exercise interventions on quality of life in clinical and healthy populations; a meta-analysis. *Social science & medicine*, 68(9), 1700-1710.
48. Segar, M. L., Eccles, J. S., & Richardson, C. R. (2011). Rebranding exercise: closing the gap between values and behavior. *International journal of behavioral nutrition and physical activity*, 8(1), 94.

- 1  
2  
3 49. Young, M. D., Plotnikoff, R. C., Collins, C. E., Callister, R., & Morgan, P. J. (2014). Social cognitive  
4 theory and physical activity: a systematic review and meta-analysis. *Obesity Reviews*, *15*(12), 983-995.  
5 50. Rustaden, A.M., et al., *Effects of BodyPump and resistance training with and without a personal trainer*  
6 *on muscle strength and body composition in overweight and obese women-A randomized controlled*  
7 *trial*. *Obes Res Clin Pract*, 2017. **11**(6): p. 728-739  
8 51. Middelkamp, J., et al., *The Effects of a Self-Efficacy Intervention on Exercise Behavior of Fitness Club*  
9 *Members in 52 Weeks and Long-Term Relationships of Transtheoretical Model Constructs*. *J Sports Sci*  
10 *Med*, 2017. **16**(2): p. 163-171).  
11 52. Middelkamp, J., Van Rooijen, M., & Steenbergen, B. (2016). Attendance behavior of ex-members in  
12 fitness clubs: A retrospective study applying the stages of change. *Perceptual and Motor Skills*, *122*(1),  
13 350-359.  
14 53. Masse, L.C., et al., *Understanding the mechanism of physical activity behavior change: Challenges and*  
15 *a call for action Introduction*. *Psychology of Sport and Exercise*, 2011. **12**(1): p. 1-6).  
16 54. Kaleta, D., Makowiec-Dąbrowska, T., Dziańska-Zaborszczyk, E., & Jegier, A. (2006). Physical  
17 activity and self-perceived health status. *International journal of occupational medicine and*  
18 *environmental health*, *19*(1), 61-69.  
19 55. Caputo, A. (2017). Social desirability bias in self-reported well-being measures: Evidence from an  
20 online survey. *Universitas Psychologica*, *16*(2), 245-255.  
21 56. Dumith, S. C., Hallal, P. C., Reis, R. S., & Kohl III, H. W. (2011). Worldwide prevalence of physical  
22 inactivity and its association with human development index in 76 countries. *Preventive*  
23 *medicine*, *53*(1-2), 24-28.  
24 57. Sallis, J. F., & Saelens, B. E. (2000). Assessment of physical activity by self-report: status, limitations,  
25 and future directions. *Research quarterly for exercise and sport*, *71*(sup2), 1-14.  
26 58. Schaller, A., Rudolf, K., Dejonghe, L., Grieben, C., & Froboese, I. (2016). Influencing factors on the  
27 overestimation of self-reported physical activity: a cross-sectional analysis of low back pain patients  
28 and healthy controls. *BioMed research international*, 2016.  
29  
30  
31  
32  
33  
34  
35  
36  
37  
38  
39  
40  
41  
42  
43  
44  
45  
46  
47  
48  
49  
50  
51  
52  
53  
54  
55  
56  
57  
58  
59  
60

1  
2  
3 **Figure 1.** The flow chart of the participants throughout the data-collection.  
4  
5  
6  
7  
8  
9  
10  
11  
12  
13  
14  
15  
16  
17  
18  
19  
20  
21  
22  
23  
24  
25  
26  
27  
28  
29  
30  
31  
32  
33  
34  
35  
36  
37  
38  
39  
40  
41  
42  
43  
44  
45  
46  
47  
48  
49  
50  
51  
52  
53  
54  
55  
56  
57  
58  
59  
60

For peer review only

1  
2  
3  
4  
5  
6  
7  
8  
9  
10  
11  
12  
13  
14  
15  
16  
17  
18  
19  
20  
21  
22  
23  
24  
25  
26  
27  
28  
29  
30  
31  
32  
33  
34  
35  
36  
37  
38  
39  
40  
41  
42  
43  
44  
45  
46  
47  
48  
49  
50

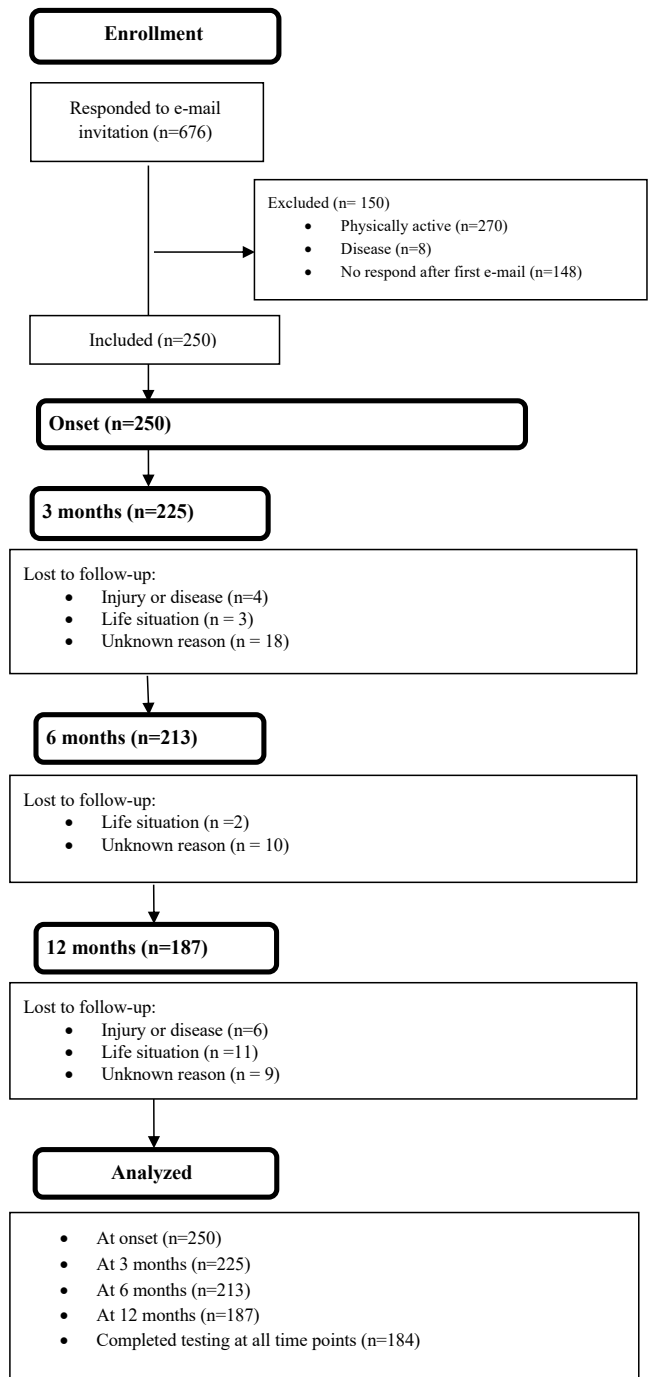

**Figure 1:** Flow diagram of the participants throughout the study.

STROBE Statement—Checklist of items that should be included in reports of *cross-sectional studies*

|                              | Item No | Recommendation                                                                                                                                                                                    | Page No        |
|------------------------------|---------|---------------------------------------------------------------------------------------------------------------------------------------------------------------------------------------------------|----------------|
| <b>Title and abstract</b>    | 1       | (a) Indicate the study's design with a commonly used term in the title or the abstract                                                                                                            | 4              |
|                              |         | (b) Provide in the abstract an informative and balanced summary of what was done and what was found                                                                                               | 2-3            |
| <b>Introduction</b>          |         |                                                                                                                                                                                                   |                |
| Background/rationale         | 2       | Explain the scientific background and rationale for the investigation being reported                                                                                                              | 4-5            |
| Objectives                   | 3       | State specific objectives, including any prespecified hypotheses                                                                                                                                  | 5              |
| <b>Methods</b>               |         |                                                                                                                                                                                                   |                |
| Study design                 | 4       | Present key elements of study design early in the paper                                                                                                                                           | 3              |
| Setting                      | 5       | Describe the setting, locations, and relevant dates, including periods of recruitment, exposure, follow-up, and data collection                                                                   | 6              |
| Participants                 | 6       | (a) Give the eligibility criteria, and the sources and methods of selection of participants                                                                                                       | 6              |
| Variables                    | 7       | Clearly define all outcomes, exposures, predictors, potential confounders, and effect modifiers. Give diagnostic criteria, if applicable                                                          | 7-8            |
| Data sources/<br>measurement | 8*      | For each variable of interest, give sources of data and details of methods of assessment (measurement). Describe comparability of assessment methods if there is more than one group              | 6-8            |
| Bias                         | 9       | Describe any efforts to address potential sources of bias                                                                                                                                         |                |
| Study size                   | 10      | Explain how the study size was arrived at                                                                                                                                                         | 6-7            |
| Quantitative variables       | 11      | Explain how quantitative variables were handled in the analyses. If applicable, describe which groupings were chosen and why                                                                      | 7-8            |
| Statistical methods          | 12      | (a) Describe all statistical methods, including those used to control for confounding                                                                                                             | 9              |
|                              |         | (b) Describe any methods used to examine subgroups and interactions                                                                                                                               | 9              |
|                              |         | (c) Explain how missing data were addressed                                                                                                                                                       | 9              |
|                              |         | (d) If applicable, describe analytical methods taking account of sampling strategy                                                                                                                |                |
|                              |         | (e) Describe any sensitivity analyses                                                                                                                                                             |                |
| <b>Results</b>               |         |                                                                                                                                                                                                   |                |
| Participants                 | 13*     | (a) Report numbers of individuals at each stage of study—eg numbers potentially eligible, examined for eligibility, confirmed eligible, included in the study, completing follow-up, and analysed | 9 and Figure 1 |
|                              |         | (b) Give reasons for non-participation at each stage                                                                                                                                              | Figure 1       |
|                              |         | (c) Consider use of a flow diagram                                                                                                                                                                | Figure 1       |
| Descriptive data             | 14*     | (a) Give characteristics of study participants (eg demographic, clinical, social) and information on exposures and potential confounders                                                          | 10             |
|                              |         | (b) Indicate number of participants with missing data for each variable of interest                                                                                                               | Table 2-3      |
| Outcome data                 | 15*     | Report numbers of outcome events or summary measures                                                                                                                                              | 10-11          |
| Main results                 | 16      | (a) Give unadjusted estimates and, if applicable, confounder-adjusted estimates and their precision (eg, 95% confidence interval). Make                                                           | 10-13          |

|                          |    |                                                                                                                                                                            |       |
|--------------------------|----|----------------------------------------------------------------------------------------------------------------------------------------------------------------------------|-------|
|                          |    | clear which confounders were adjusted for and why they were included                                                                                                       |       |
|                          |    | (b) Report category boundaries when continuous variables were categorized                                                                                                  |       |
|                          |    | (c) If relevant, consider translating estimates of relative risk into absolute risk for a meaningful time period                                                           |       |
| Other analyses           | 17 | Report other analyses done—eg analyses of subgroups and interactions, and sensitivity analyses                                                                             | 10-13 |
| <b>Discussion</b>        |    |                                                                                                                                                                            |       |
| Key results              | 18 | Summarise key results with reference to study objectives                                                                                                                   | 14    |
| Limitations              | 19 | Discuss limitations of the study, taking into account sources of potential bias or imprecision. Discuss both direction and magnitude of any potential bias                 | 17    |
| Interpretation           | 20 | Give a cautious overall interpretation of results considering objectives, limitations, multiplicity of analyses, results from similar studies, and other relevant evidence | 14-17 |
| Generalisability         | 21 | Discuss the generalisability (external validity) of the study results                                                                                                      | 16    |
| <b>Other information</b> |    |                                                                                                                                                                            |       |
| Funding                  | 22 | Give the source of funding and the role of the funders for the present study and, if applicable, for the original study on which the present article is based              | 6     |

\*Give information separately for exposed and unexposed groups.

**Note:** An Explanation and Elaboration article discusses each checklist item and gives methodological background and published examples of transparent reporting. The STROBE checklist is best used in conjunction with this article (freely available on the Web sites of PLoS Medicine at <http://www.plosmedicine.org/>, Annals of Internal Medicine at <http://www.annals.org/>, and Epidemiology at <http://www.epidem.com/>). Information on the STROBE Initiative is available at [www.strobe-statement.org](http://www.strobe-statement.org).
